1 **ZINC- $\alpha$ 2-GLYCOPROTEIN IS AN INHIBITOR OF AMINE OXIDASE COPPER-**  
2 **CONTAINING 3**

3 **Matthias Romauch**

4 **Affiliation: Institute of Molecular Biosciences, Karl-Franzens-University**

5 **Contact: [matthias.romauch@gmail.com](mailto:matthias.romauch@gmail.com) or [m.romauch@edu.uni-graz.at](mailto:m.romauch@edu.uni-graz.at)**

6 **Abstract**

7 **Zinc-alpha2-glycoprotein (ZAG) is a major plasma protein whose levels increase in**  
8 **chronic energy-demanding diseases and thus serves as an important clinical biomarker**  
9 **in the diagnosis and prognosis of the development of cachexia. Current knowledge**  
10 **suggests that ZAG mediates progressive weight loss through  $\beta$ -adrenergic signaling in**  
11 **adipocytes, resulting in the activation of lipolysis and fat mobilization. Here, through**  
12 **crosslinking experiments, amine oxidase copper-containing 3 (AOC3) is identified as a**  
13 **novel ZAG binding partner. AOC3 – also known as vascular adhesion protein 1 (VAP-1)**  
14 **and semicarbazide sensitive amine oxidase (SSAO) – deaminates primary amines,**  
15 **thereby generating the corresponding aldehyde,  $H_2O_2$  and  $HN_3$ . It is an ectoenzyme**  
16 **largely expressed by adipocytes and induced in endothelial cells during inflammation.**  
17 **Extravasation of immune cells depends on amine oxidase activity and AOC3-derived**  
18  **$H_2O_2$  has an insulinogenic effect. The observations described here suggest that ZAG acts**  
19 **as an allosteric inhibitor of AOC3 and interferes with the associated pro-inflammatory**  
20 **and anti-lipolytic functions. Thus, inhibition of the deamination of lipolytic hormone**  
21 **octopamine by AOC3 represents a novel mechanism by which ZAG might stimulate**  
22 **lipolysis. Furthermore, experiments involving overexpression of recombinant ZAG**  
23 **reveal that its glycosylation is co-regulated by oxygen availability and that the pattern of**  
24 **glycosylation affects its inhibitory potential. The newly identified protein interaction**

25 **between AOC3 and ZAG highlights a previously unknown functional relationship, which**  
26 **may be relevant to inflammation, energy metabolism and the development of cachexia.**

27

## 28 **1 Introduction**

29 Zinc- $\alpha$ 2-glycoprotein (ZAG) was first isolated from human plasma more than 50 years ago. Its  
30 name derives from its physicochemical properties, as it precipitates with bivalent ions such as  
31 zinc, appears in the  $\alpha$ 2 fraction of electrophoretically separated plasma proteins and is  
32 glycosylated [1]. The highest expression levels of ZAG are found in liver [2,3], white adipose  
33 tissue [4,5] and prostate [6,7]. ZAG is primarily found in body fluids including plasma and  
34 semen and is thought to mediate its effect by binding to the  $\beta$ <sub>3</sub>-adrenergic receptor [8]. ZAG is  
35 a MHC (major histocompatibility complex)-like molecule and accordingly its structure  
36 comprises a peptide-binding groove, surrounded by  $\alpha$ -helices forming the  $\alpha$ 1 and  $\alpha$ 2 domains  
37 and the  $\alpha$ 3 subdomain [9,10]. Unlike classical MHC molecules, ZAG has no transmembrane  
38 domain and is therefore only found as a soluble protein in body fluids [11,12]. Furthermore,  
39 ZAG specifically binds fluorophore-tagged 11-(dansylamino)-undecanoic acid, which is not  
40 observed for other MHC homologs [11]. To date, only prolactin-inducible protein has been  
41 identified as physiological ligand for seminal ZAG [12] but it is not clear whether ZAG forms  
42 part of the antigen-processing pathway.

43 ZAG has been associated with many divergent biological functions. For example, after stable  
44 transfection or addition to the medium, ZAG inhibits the progression of cancer cells through  
45 the cell cycle by downregulation of the cyclin-dependent kinase 1 (CDK1) gene [13].  
46 Intriguingly, the opposite effect was observed in 3T3-L1 pre-adipocytes: transfection with  
47 ZAG cDNA stimulated cell growth but inhibited differentiation, accompanied by a nearly 40%  
48 reduction in triglyceride content [14]. ZAG has also been identified as a ribonuclease, with

49 comparable activity to onconase, but a much lower activity than RNase A [15]. In seminal  
50 fluid, ZAG is found on the surface of spermatozoa, where it is thought to be involved in sperm  
51 motility and capacitation [16,17].

52 ZAG is an important clinical marker in the diagnosis and prognosis of cancer [7,18]. It is  
53 strongly elevated in the plasma of cancer patients suffering from progressive weight loss  
54 [19,20]. Elevation of ZAG has been especially observed in patients suffering from cancer of  
55 the gastrointestinal system [21,22], breast [23,24], and prostate gland [7,18,25,26]. All these  
56 malignancies are accompanied by higher energy expenditure and progressive loss of muscle  
57 and fat mass [4,27,28]. This devastating state – named cachexia – is a multi-factorial syndrome  
58 that cannot be overcome by nutritional support and ultimately leads to functional impairment.  
59 The positive correlation between increased ZAG expression and weight loss has also been  
60 observed in mice suffering from tumor-induced cachexia [28–30]. ZAG is also elevated in  
61 chronic diseases of the heart [31], the kidney [32,33] and the lung [34–36], as well as in AIDS  
62 (acquired immunodeficiency syndrome) [37,38], all of which are also associated with the  
63 development of cachexia. However, ZAG levels are also significantly reduced during the early  
64 phase of sepsis, but increase again during recovery [39]. This is underpinned by the finding  
65 that ZAG is downregulated by pro-inflammatory mediators such as TNF- $\alpha$ : an inverse  
66 correlation between ZAG and TNF- $\alpha$ , VCAM-1, MCP-1 and CRP has been observed in  
67 patients suffering from systemic inflammation associated with chronic kidney disease, obesity  
68 and metabolic syndrome [40–42]. Therefore, ZAG is described as having an anti-inflammatory  
69 function.

70 ZAG has been also linked to the development of organ fibrosis [43]. An important mediator of  
71 this process is TGF- $\beta$ , which turns fibroblasts into myofibroblasts, resulting in the production  
72 of large amounts of collagen and extracellular matrix components, thereby inducing  
73 dedifferentiation of surrounding parenchymal cells [44,45]. ZAG has been shown to counteract

74 TGF- $\beta$ -mediated effects [46]. Indeed, in experimental models of renal tubulointerstitial  
75 fibrosis, ZAG deficiency exacerbates deposition of interstitial collagen and fibroblast activation  
76 [43]. Furthermore, induction of cardiac hypertrophy and fibrosis in mice by thoracic aortic  
77 constriction leads to the same tissue alterations as interstitial fibrosis and fibroblast activation  
78 [43]. Notably, the exogenous application of recombinant ZAG reduces fibrosis in ZAG  
79 knockout (k.o.) mice to the level of heterozygous littermates. *In vitro* experiments revealed that  
80 TGF- $\beta$ -induced expression of  $\alpha$ -SMA can be blocked by addition of ZAG. Co-  
81 immunoprecipitation experiments showed that ZAG neither interacts with TGF- $\beta$  nor its  
82 receptor, however. Furthermore, blocking ZAG signaling, which is supposedly mediated  
83 through the  $\beta_3$ -adrenergic receptor, by propranolol, a non-selective antagonist of  $\beta$ -adrenergic  
84 receptors, did not restore TGF- $\beta$ -induced  $\alpha$ -SMA expression. This suggests that ZAG mediates  
85 its anti-inflammatory effect through a  $\beta_3$ -adrenergic-independent signaling pathway [43].

86 ZAG-deficient mice exhibit mild obesity and reduced *in vitro* lipolysis. The lipolytic effect was  
87 tested by increasing cAMP levels using forskolin and isobutylmethylxanthine and stimulating  
88  $\beta$ -adrenergic receptors using isoproterenol ( $\beta$ -nonspecific) and CL2316,243 ( $\beta_3$ -specific). All  
89 tested substances showed reduced lipolysis compared with wild-type (wt) controls [47]. The  
90 authors suggest that ZAG might mediate its effect by binding to a receptor other than the  $\beta_3$ -  
91 adrenergic receptor.

92 Taken together, ZAG seems to play many physiological roles, although scientists disagree on  
93 which signaling pathways mediate its effects. Hence, identifying the ZAG receptor could  
94 provide much-needed insight into the mechanism of ZAG function and stimulate future work  
95 in basic and clinical research on ZAG.

96

## 97 **2 Results**

### 98 **2.1 ZAG binds to ectoenzyme AOC3**

99 To attempt to identify ZAG interaction partners, purified recombinant ZAG and freshly  
100 prepared adipocyte plasma membranes were co-incubated and any physical interactions  
101 between them were stabilized by a photoactivatable crosslinker molecule (Fig. 11). Both  
102 human and murine ZAG (without leader sequence) were produced in *E. coli* after cloning in  
103 the expression plasmid pGEX-6P-2 and affinity purified by GST (glutathione-S-transferase)-  
104 tag. Both purified human and mouse proteins (GST-hZAG and GST-mZAG, respectively) and  
105 GST-tag alone – serving as a control – were labeled with the photoactivatable crosslinker  
106 Sulfo-SBED (Sulfo-N-hydroxysuccinimidyl-2-(6-[biotinamido]-2-(p-azido benzamido)-  
107 hexanoamido) ethyl-1,3'-dithiopropionate). Labeled GST-mZAG and GST-tag were  
108 incubated with prepared plasma membranes from murine wt adipose tissue, while GST-hZAG  
109 was incubated with plasma membrane from differentiated SGBS cells (human adipocyte cell  
110 line). After UV light exposure and the addition of  $\beta$ -mercaptoethanol (reducing agent), the  
111 samples were separated by SDS-PAGE and proteins revealed by western blot (WB) using  
112 streptavidin and anti-GST antibody. Using streptavidin, one band was detected using GST-tag  
113 (Fig. 1, Aa, lane 1) as bait protein and three bands were detected using GST-mZAG or GST-  
114 hZAG as bait proteins (Fig. 1, Aa, lane 2 and 3). The lowest band at ~26 kDa (kildodalton)  
115 represents the labeled GST-tag (\*) (Fig. 1, Aa, lanes 1-3) and was found in the control and  
116 samples incubated with GST-ZAG (\*\*). This is due to loss of the GST-tag, which could not be  
117 completely prevented during overexpression of GST-ZAG in *E. coli*. The band at ~66kDa  
118 represents labeled GST-ZAG (\*\*) (Fig. 1, Aa, lanes 2 and 3). The band at ~80 kDa represents  
119 a hitherto-unknown protein X (\*\*\*), to which a biotin tag was transferred after reducing the  
120 crosslinker molecule with  $\beta$ -mercaptoethanol (Fig. 1, Aa, lanes 2 and 3). Notably, the ~80 kDa  
121 band was only present when GST-mZAG or GST-hZAG were used as bait proteins. The GST-

122 tag alone was not associated with any signal at ~80 kDa. Interestingly, using plasma membrane  
123 of SGBS cells (of human origin) led to the same signal as observed with murine wt adipocyte  
124 plasma membrane (Fig. 1, Aa, lane 3). After stripping, the WB membrane was reprobed with  
125  $\alpha$ -GST antibody, when only GST-tag (Fig. 1, Ab, lane 1, 2 and 3), GST-tagged murine ZAG  
126 (Fig. 1, Ab, lane 2) and GST-tagged human ZAG (Fig. 1, Ab, lane 3) were detected. Under  
127 non-reducing conditions – i.e. without  $\beta$ -mercaptoethanol and leaving the crosslinker  
128 uncleaved – the GST-ZAG signal (Fig. 1, Ac, lane 1) shifts to a size of around 250 kDa (Fig.  
129 1, Ac, lane 2).

130 Due to the simplicity and availability of murine adipose tissue, special focus was placed on  
131 identifying the 80 kDa interaction partner. Non-reduced samples from the above affinity  
132 purification were separated by native SDS-PAGE to guarantee their presence in the same gel  
133 fraction. The gel was stained with Coomassie Brilliant Blue and bands excised with a scalpel  
134 (Fig. 1, Ad). For orientation, a WB of non-reduced samples probed with streptavidin was  
135 carried out in parallel. Excised bands were prepared and subjected to mass spectrometry-  
136 based peptide sequencing. One excised band contained ZAG and identified SSAO (Fig. 1, B,  
137 red box) – from this point named AOC3 – as a putative interaction partner. AOC3 has a  
138 molecular weight of ~84 kDa and exists as a homodimer. Given this, the shift of the GST  
139 signal to a higher molecular weight under non-reducing conditions (Fig. 1, Ac) can be  
140 explained by binding between one homodimeric AOC3 and at least one GST-ZAG molecule.  
141 To confirm the newly identified protein interaction, it was attempted to purify AOC3 from *E.*  
142 *coli*. Since all expression conditions failed, a modified method using HEK293 cells as  
143 expression host was chosen [48]. Using lentivirus, secretable forms of GST-AOC3 (  
144 Fig. 10) and GST-tag were stably expressed in HEK293 cells. Both proteins were affinity  
145 purified from the conditioned medium. To ascertain whether recombinant GST-AOC3 interacts  
146 with murine plasma ZAG, a GST-pulldown was performed (Fig. 1, C). Plasma of overnight-

147 fasted C57Bl6 male wt mice was incubated with recombinant GST-AOC3 and GST as a  
148 control. A WB of the eluate fraction revealed that GST-AOC3 bound ZAG from murine  
149 plasma, whereas GST alone did not.

## 150 **2.2 ZAG functions as an allosteric inhibitor of AOC3**

151 AOC3 belongs to the family of copper-containing amine oxidases. It catalyzes the oxidative  
152 deamination of primary amines, generating the corresponding aldehydes, hydrogen peroxide  
153 ( $H_2O_2$ ), and ammonia ( $NH_3$ ). The enzyme forms a homodimer, with each unit bound to the  
154 plasma membrane via a short transmembrane domain and the catalytic center oriented on the  
155 extracellular side [49]. For activity measurements, recombinant or endogenous AOC3 is  
156 incubated with the synthetic substrate benzylamine or [ $^{14}C$ ]-benzylamine. Non-radioactive  
157 assays measure  $H_2O_2$ , which oxidizes Amplex Red to its fluorescent analog resorufin in the  
158 presence of horse radish peroxidase (HRPO). Using [ $^{14}C$ ]-benzylamine as substrate, the activity  
159 corresponds to the amount of [ $^{14}C$ ]-benzaldehyde generated. For each molecule of  
160 benzylamine, one molecule of  $H_2O_2$  and one molecule of  $NH_3$  are generated. LJP1586 (Z-3-  
161 fluoro-2-(4-methoxybenzyl)-allylamine hydrochloride) serves as an inhibitor. To investigate  
162 whether ZAG can modulate AOC3 activity, both GST-tagged AOC3 and ZAG of murine origin  
163 were purified from lentivirally transduced HEK293 cells and the GST-tag was removed. In all  
164 control assays, ZAG was replaced by the same amount of GST purified from stably transfected  
165 HEK293 cells. In a first attempt, activity assays were performed using Amplex Red reagent  
166 (Fig. 2, A). A saturation curve using benzylamine as substrate revealed the highest activity at  
167 100  $\mu M$  (Fig. 2, B). To characterize the interaction between AOC3 and ZAG, both proteins were  
168 mixed at different molar ratios. A stepwise increase in the concentration of recombinant ZAG  
169 led to a stepwise decrease in recombinant AOC3 activity. The strongest inhibition was  
170 observed at a molar AOC3/ZAG ratio of  $\sim 1:1$  (25 ng ZAG) (Fig. 2, C). GST alone did not show  
171 any inhibitory effect. Next, the mechanism of inhibition was investigated by generating a

172 Michaelis-Menten plot, which revealed that  $V_{\max}$  (maximum velocity) decreases, whereas  $K_m$   
173 (i.e. the Michaelis-Menten constant: substrate concentration at half-maximum velocity)  
174 remains almost constant, with rising ZAG concentrations (Fig. 2, D). A Lineweaver-Burk  
175 diagram clearly illustrates the difference in  $V_{\max}$  and  $K_m$  behavior. A constant  $K_m$  value is  
176 represented by the intersection of the function with the y-axis (Fig. 2, E). This suggests that  
177 ZAG functions as a highly effective allosteric inhibitor of AOC3. It means that ZAG binds  
178 AOC3, but not at the catalytic site, thereby reducing the activity of the enzyme in a non-  
179 competitive manner.

180 Subsequently, it was tested whether recombinant mammalian ZAG inhibits endogenous AOC3  
181 activity as effectively as that of recombinant AOC3. Since AOC3 is expressed on the surface  
182 of adipocytes and endothelial cells, differentiated 3T3-L1 adipocytes and human coronary  
183 artery endothelial cells (HCAEC) were chosen. As a positive control for inhibition, AOC3  
184 activity was blocked by inhibitor LJP1586. To eliminate any non-specific background signals  
185 in the cell experiments, assays were performed radioactively. The activity of 3T3-L1-derived  
186 AOC3 was effectively reduced as the amount of recombinant ZAG was increased. The addition  
187 of 50  $\mu\text{g/ml}$  recombinant ZAG inhibited [ $^{14}\text{C}$ ]-benzaldehyde formation to a similar extent as  
188 LJP1586 (Fig. 3, A). This is remarkable since the highest concentration of ZAG used (50  
189  $\mu\text{g/ml}$   $\approx$  1.2  $\mu\text{M}$ ) is nearly tenfold less in molar terms than for the small molecule inhibitor  
190 LJP1586 (10  $\mu\text{M}$ ). This underpins the highly specific nature of this protein interaction, with  
191 similar ZAG concentrations being present in human plasma ( $\sim$ 50  $\mu\text{g/ml}$  serum) [50].  
192 Furthermore, the inhibitory effect of recombinant ZAG on HCAEC AOC3 (Fig. 3, B)  
193 confirmed the similarity between murine and human AOC3, underlining the crosslinking  
194 results obtained with SGBS cell membranes and indicating that the ZAG-AOC3 interaction  
195 also plays an important role in humans. Since the inhibitor LJP1586 is designed for murine  
196 AOC3, a higher concentration was needed to block human AOC3 of HCAEC origin.



197 Comparing the raw data, 3T3-L1 adipocytes and HCAEC cells showed the same AOC3  
198 activity. The tenfold-higher activity of 3T3-L1 adipocytes compared with HCAEC relates to  
199 the normalization to mg cellular protein/measurement: 3T3-L1 adipocytes contain much less  
200 protein.

201 Since recombinant ZAG inhibits endogenous AOC3, it was asked whether endogenous ZAG  
202 could inhibit recombinant AOC3. For this purpose, plasma of C57Bl6 wt mice was collected  
203 and rebuffed in 10 mM Tris-HCl, pH 8 (ZAG-pI: ~5.8). Plasma proteins were separated by  
204 anion exchange chromatography and eluted by linear NaCl gradient (Fig. 4, A). ZAG-containing  
205 fractions were identified by WB and used for activity assays. Fractions C12 and D1 showed a  
206 signal between 37 kDa and 50 kDa, which corresponds to murine plasma ZAG (Fig. 4, A). ZAG-  
207 containing fractions (C12 and D1) were pooled, as were fractions without any ZAG (D3 and  
208 D4) as controls, and incubated with 50 ng recombinant AOC3 (Fig. 4, B). The ZAG-positive  
209 fractions reduced recombinant AOC3 in a dose-dependent manner. However, the control IEX  
210 fractions, which contained no ZAG, enhanced recombinant AOC3 activity in a dose-dependent  
211 manner, rather than having the expected neutral effect. This stimulatory effect is probably due  
212 to both endogenous AOC3 activity and plasma components. First, murine plasma (except that  
213 of AOC3 k.o. mice) contains endogenous amine oxidase activity, which can be blocked by the  
214 inhibitor LJP1586 (Supplemental Fig. 1, A, B and C). Plasma-derived AOC3 activity results  
215 from release of the membrane-bound enzyme from cells by metalloprotease activity [51–53].  
216 However, measurement of amine oxidase activity of IEX fractions – either containing or not  
217 containing ZAG – before adding recombinant AOC3 revealed no endogenous activity  
218 (Supplemental Fig. 2, C). Second, incubation of recombinant AOC3 with plasma of wt, AOC3  
219 k.o. and ZAG k.o. mice enhanced AOC3 activity ~3-fold (Supplemental Fig. 1, D). Therefore,  
220 a plasma component found in all three genotypes must be responsible for enhancing AOC3  
221 activity. Third, the IEX fractions lacking ZAG (D3 and D4) correspond to the major protein

222 peak of the IEX profile, which mostly derives from albumin. Incubating recombinant AOC3  
223 with fatty acid-free bovine serum albumin (BSA) also enhanced recombinant AOC3 activity  
224 to the same extent as murine plasma (Supplemental Fig. 2, A). Fourth, the literature describes  
225 a low molecular-weight plasma component (3.8 kDa), which in combination with  
226 lysophosphatidylcholine (LPC) boosts AOC3 activity [54]. LPC makes up to 4-20% of total  
227 plasma phospholipid content [55] and albumin is an important LPC storage protein [56].  
228 Therefore, the IEX fractions lacking ZAG may contain the AOC3-activating plasma  
229 component, which is fully active in the presence of LPC. Notably, incubation of human lung-  
230 microsomal AOC3 with filtered and lyophilized human plasma (FLHP) enhances AOC3  
231 activity up to 5-fold [54], which is similar to the effect of adding 200  $\mu$ l of the IEX fractions  
232 lacking ZAG to recombinant AOC3 (Fig. 4, B).

233 To substantiate this finding, the plasma of wt mice and ZAG k.o. mice were compared. ZAG-  
234 containing fractions (C12 and D1) of wt plasma were identified by WB using  $\alpha$ -ZAG antibody  
235 (Fig. 4, C). A WB of the corresponding fractions of ZAG k.o. plasma showed no signal (Fig. 4,  
236 C). Fifty  $\mu$ l of the IEX fractions of wt plasma and the corresponding IEX fractions of ZAG k.o.  
237 plasma were incubated with 50 ng AOC3. As before, ZAG-containing fractions of wt plasma  
238 reduced benzylamine catalysis by AOC3, whereas the corresponding fractions of ZAG k.o.  
239 plasma did not (Fig. 4, D).

240

### 241 **2.3 ZAG inhibition of AOC3 augments stimulation of lipolysis**

242 Most of the literature describes ZAG as an agonist of the  $\beta$ -adrenergic receptors, thereby  
243 stimulating downstream elements leading to an increase in lipolysis. To test this hypothesis,  
244 ZAG (50  $\mu$ g/ml), GST (50  $\mu$ g/ml), LJP1586 (10  $\mu$ M) and isoproterenol (10  $\mu$ M), a short-  
245 acting non-specific  $\beta$ -adrenergic agonist, were incubated with differentiated 3T3-L1 cells (

246 Fig. 5, A). Compared to ZAG, isoproterenol significantly enhanced glycerol release already  
247 within the first thirteen minutes. ZAG, GST and LJP1586 showed no such effect. Incubating  
248 differentiated 3T3-L1 cells with ZAG (50  $\mu$ g/ml), GST (50  $\mu$ g/ml) and LJP1586 (10  $\mu$ M) for  
249 several hours revealed that, although ZAG showed a lipolytic effect, this did not occur until  
250 twelve hours (

251 Fig. 5, B). Therefore, ZAG definitely does not behave as a classical  $\beta$ -adrenergic agonist such  
252 as isoproterenol and another mechanism must be involved in ZAG-stimulated lipolysis, most  
253 likely involving AOC3. Although it is not well characterized, AOC3 is thought to be involved  
254 in the catalysis of biogenic amines such as methylamine, aminoacetone, dopamine, histamine  
255 and trace amines [57,58]. Hence, blockade of AOC3-dependent deamination of biologically  
256 active amines by ZAG might indirectly affect the metabolic state of the cell. To investigate  
257 which biogenic amines might modulate lipolytic activity, a set of biogenic amines was tested  
258 for catalysis by AOC3 (

259 Fig. 5, C). A colorimetric assay based on 4-nitrophenyl-boronic acid oxidation in the  
260 presence of  $H_2O_2$  was performed [59], since molecules such as noradrenaline, octopamine  
261 and dopamine interfered with the Amplex Red assay, due to the photo-oxidation of substrates  
262 [60]. The strongest activity was observed with tyramine, histamine, dopamine, cadaverine,  
263 cysteamine, ethanolamine, octopamine, putrescin, spermidine, isopentylamine and  
264 benzylamine (

265 Fig. 5, C). Subsequently, the same set of biogenic amines was tested for their ability to  
266 stimulate lipolysis in 3T3-L1 adipocytes (

267 Fig. 5, D). Comparing the two assays revealed that histamine, cysteamine, cadaverine and  
268 octopamine (trace amine) are converted by AOC3 and stimulate lipolysis to a varying degree.  
269 Notably, noradrenaline and octopamine both strongly stimulated lipolysis, but only

270 octopamine was converted by AOC3. In the follow-up experiments, only noradrenaline and  
271 octopamine were used to generate a significant difference in glycerol release. Noradrenaline  
272 belongs to the family of catecholamines and is described as an agonist of  $\alpha$ - and  $\beta$ - adrenergic  
273 receptors [61]. Octopamine belongs to the family of trace amines and functions by binding to  
274 trace amine associated receptor 1 (TAAR1) and  $\beta_3$ -adrenergic receptor [62,63]. To ask  
275 whether reduced AOC3 activity enhances glycerol release, lipolysis stimulation assays were  
276 performed in the presence of LJP1586 or ZAG. In all control assays, ZAG was replaced by  
277 the same amount of GST purified from stably expressing HEK293 cells. In the case of  
278 noradrenaline and isoproterenol, the addition of LJP1586 did not enhance glycerol release (  
279 Fig. 5, E and F). This is in line with the observations that noradrenaline is not converted by  
280 AOC3 and isoproterenol contains no primary amine. However, the presence of LJP1586 (10  
281  $\mu$ M) or ZAG (50  $\mu$ g/ml) boosted octopamine-stimulated lipolysis (Fig. 6, A and B). This  
282 suggests that reduced deamination of octopamine results in higher bioavailability, leading to a  
283 stronger  $\beta_3$ -adrenergic or possibly TAAR1-mediated lipolytic stimulation, although the  
284 presence of TAAR1 in adipocytes has not been described thus far. Finally, it is notable that the  
285 effect of ZAG diminished with increasing octopamine concentration compared with LJP1586  
286 (Fig. 6, A and B), which probably points to a different mode of inhibition.

#### 287 **2.4 The inhibitory potential of recombinant ZAG depends on glycosylation**

288 ZAG is a highly abundant protein found in body fluids such as blood and semen. According to  
289 the literature, ZAG can be glycosylated in a number of different ways, suggesting different  
290 functions [64,65]. This is in accordance with the observation that the plasma ZAG of different  
291 C57Bl6 mice was not always the same size (Fig. 7, A1). The notion that this size difference  
292 depends on glycosylation was proven by the treatment of murine plasma proteins with PNGase  
293 F (peptide: N-glycosidase F). Upon treatment with PNGase F, ZAG reduced in size to ~32 kDa

294 (calculated MW ~33.6 kDa) according to SDS-PAGE. In ZAG k.o. plasma, no ZAG signal was  
295 detected (Fig. 7, A2). During this study, recombinant ZAG expression was tested in different  
296 expression hosts such as *E. coli*, *Saccharomyces cerevisiae*, *Komagatella pastoris*, *Sf9* and *BTI-*  
297 *Tn-5B1-4* insect cells, as well as the mammalian cell lines Expi293F and adherent HEK293  
298 cells. Among all the expression hosts tested, the largest difference in glycosylation was found  
299 between Expi293F and HEK293 cells. Expi293F cells are HEK293 cells adapted to grow in  
300 suspension; they are used for large-scale production of recombinant proteins in industry.  
301 Overexpressing GST-ZAG in HEK293 cells and removal of the GST-tag by PreScission  
302 Protease resulted in a SDS-PAGE band of less than 46 kDa (Fig. 7, A3). Overexpressing GST-  
303 ZAG and Flag-ZAG in Expi293F resulted in a broad band that became more diffuse with  
304 increasing expression time (Fig. 7, A4). To confirm that this was due to glycosylation,  
305 Expi293F-driven GST-ZAG overexpression was combined with tunicamycin (a compound  
306 suppressing glycosylation in general) at different concentrations (Fig. 7, A5). Overexpression  
307 of GST-ZAG and Flag-ZAG in the presence of 1 µg/ml tunicamycin showed a reduction in  
308 size of both proteins (Fig. 7, A6). Treating Expi293F-derived GST-ZAG with PNGase F led to  
309 the same result. After removal of the GST-tag, two distinct bands (Fig. 7, A7, asterisks) were  
310 detected and, after deglycosylation by PNGase F, both ZAG bands appeared to combine at ~32  
311 kDa (Fig. 7, A7), as observed with PNGase F-treated murine plasma ZAG and tunicamycin-  
312 treated Flag-ZAG. Since O-glycosylation might also affect the size of the protein, another  
313 overexpression experiment was performed with GST-ZAG in the presence of the inhibitor  
314 benzyl-2-acetamido-2-deoxy- $\alpha$ -D-galactopyranoside (BAGN). No effect on the size of the  
315 protein was observed, however, which underlines the notion that size differences depend on N-  
316 glycosylation events (Fig. 7, B). The N-glycosylation site – known as the sequon – is defined  
317 by the amino acid sequence Asn-X-Ser (asparagine-X-serine) or Asn-X-Thr (asparagine-X-  
318 threonine). X can be any amino acid except proline and the Asn residue serves as the anchor

319 point for N-glycosylation. The murine ZAG peptide sequence has three different N-  
320 glycosylation sites at positions 123, 190 and 254 (the numbers relate to the position of the Asn  
321 residue within the murine peptide sequence with the leader sequence). Different glycoforms of  
322 ZAG were generated by mutating the Asn residues to glutamine. Single mutations and  
323 combined mutations led to seven different ZAG glycoforms: 123, 190, 254, 123/190, 123/254,  
324 190/254 and  $\Delta 3$  (where, in the latter case, all three sites were mutated). Using HEK293 and  
325 Expi293F cells as expression hosts showed that the size of the protein declined with the number  
326 of available N-glycosylation sites (Fig. 8, A1 and B1). Nevertheless, reducing the number of  
327 glycosylation sites did not lead to a discrete, monodisperse ZAG band in Expi293F cells, as  
328 was observed for ZAG overexpressed in HEK293 or for plasma-derived ZAG. One sample of  
329 Expi293F cells collected 24 h post-transfection gave a more disperse signal (Fig. 8, A2). The  
330 molecular weights of Expi293F-derived ZAG results from differently glycosylated isoforms  
331 (asterisks). It appears that overexpression in Expi293F cells leads to one higher MW and one  
332 lower MW glycosylated form in addition to the “true” isoform.

333 This variability in the same cell line might be due to growth conditions, which can affect post-  
334 translational modifications. Thus, HEK293 cells are adherent and grow in serum containing  
335 medium, whereas Expi293F cells grow in serum-free suspension. Concerning serum as  
336 medium supplement, serum-free medium is already described to significantly increase N-  
337 linked glycosylation of interleukin-2 when overexpressed in suspension growing baby hamster  
338 kidney cells [66]. Adding serum at different concentrations to Expi293F suspension culture  
339 made the cells clump and did not change glycosylation. In other types of suspension culture  
340 with host cells such as *E. coli*, insect cells (*BTI-Tn-5B1-4* and *Sf9*) or mammalian cells,  
341 oxygenation has a major impact on the success of protein expression [67–69]. From this  
342 perspective, it seemed likely that the state of oxygenation might influence the glycosylation  
343 pattern of ZAG. Since Expi293F cells grow in suspension, they might have a higher level of

344 oxygenation than HEK293 cells. Hence, reducing oxygenation might simplify the ZAG  
345 glycosylation pattern. To test this hypothesis, Expi293F cultures were supplemented with  
346 CoCl<sub>2</sub>, a hypoxia mimetic substance. Hypoxia is transcriptionally co-mediated by the  
347 transcription factor HIF1- $\alpha$ . During normoxia, HIF1- $\alpha$  is prolyl hydroxylated by prolyl-4-  
348 hydroxylases (PHDs), directing the protein to degradation by ubiquitylation. Hypoxia induces  
349 the opposite: HIF1- $\alpha$  is stabilized and PHDs are inhibited [70,71]. CoCl<sub>2</sub> mimics hypoxia by  
350 inhibiting HIF1- $\alpha$  hydroxylation by PHDs. In a first attempt, different concentrations of CoCl<sub>2</sub>  
351 were tested. Indeed, supplementing the media with the highest concentration of CoCl<sub>2</sub> (500  
352  $\mu$ M) simplified the signal of wt ZAG overexpressed in Expi293F cells from multiple bands to  
353 a single band, which is similar to the appearance of wt ZAG when expressed in HEK293 cells  
354 (Fig. 8, A3). In another experiment, all glycomutants of ZAG were overexpressed in Expi293F  
355 cells in the presence of 500  $\mu$ M CoCl<sub>2</sub>. As observed for the wt form, all ZAG mutants appeared  
356 as a single band (Fig. 8, A4).

357 To investigate how glycosylation affects the inhibition of AOC3 by ZAG, all glycomutants  
358 were overexpressed in HEK293 and Expi293F cells in parallel. After GST affinity purification,  
359 PreScission Protease digestion and dialysis, all proteins were adjusted to a concentration of 50  
360  $\mu$ g/ml and incubated with HEK293 stably expressing AOC3 with a transmembrane domain,  
361 i.e. located on the surface of the cell (Fig. 8, B2). Comparing the wt forms showed that HEK293  
362 cell-derived ZAG inhibited AOC3 activity, whereas the Expi293F cell-derived ZAG did not  
363 (Fig. 8, C). Although the less-glycosylated form of Expi293F cell-derived ZAG is very likely  
364 to be present with the hyperglycosylated form, its inhibitory potential is strongly reduced.  
365 Hence, the inhibitory effect of recombinant ZAG depends on which expression host is used.  
366 Furthermore, the various ZAG glycomutants, produced in both HEK293 and Expi293F cells,  
367 showed a widely differing ability to inhibit AOC3. Importantly, the loss of all glycosylation  
368 sites ( $\Delta$ 3-ZAG) led to the same inhibitory potential in both forms of the protein, whether



369 produced in HEK293 or Expi293F cells, which confirms the impact of aberrant glycosylation.  
370 Since the ZAG molecular weight was not consistent in all plasma samples, plasma of different  
371 mouse strains was collected. WB analysis of mouse plasma of different mouse strains did not  
372 show a homogenous pattern (Fig. 8, D). Plasma ZAG of DBA and FVB mice showed a more  
373 disperse pattern as observed when overexpressing ZAG in Expi293F cells.

### 374 **3 Discussion**

375 This work aimed to identify a new interaction partner of ZAG, which might help to explain its  
376 biological functions. Although the scientific literature is divided on the issue, most authors  
377 claim that ZAG acts via the  $\beta$ -adrenergic system.

378 The role of the adrenergic receptor system in ZAG-mediated lipolysis has been investigated *in*  
379 *vitro* using CHO-K1 cells, which were transfected with human  $\beta_1$ ,  $\beta_2$  and  $\beta_3$  receptors [72]. The  
380 binding kinetics revealed that ZAG has an affinity for  $\beta_2$  and  $\beta_3$  receptors, but not for  $\beta_1$   
381 receptors. When transfected cells were incubated with recombinant human ZAG, there was an  
382 increase of cAMP levels that could be reduced by  $\beta$ -adrenergic antagonists [72]. Based on these  
383 *in vitro* results and the fact that ZAG deficiency leads to obesity [47], it was of interest to ask  
384 whether treatment with ZAG has anti-obesity and possibly anti-diabetic effects. Therefore, the  
385 *in vivo* effect of ZAG was studied in *ob/ob* mice, which are deficient in the hormone leptin and  
386 consequently suffer from obesity, hyperphagy and insulin resistance [73]. Studies performed  
387 with *ob/ob* mice showed that ZAG administration causes improved insulin sensitivity and  
388 reduced fat mass, which could be attenuated by the addition of the non-specific  $\beta$ -  
389 adrenoreceptor antagonist propranolol [69]. Another study with ZAG-treated male Wistar rats  
390 confirmed these results [74]. Therefore, it is very likely that ZAG acts as an adipokine and is  
391 directly involved in the breakdown of fat tissue.



392 However, another group directly compared the *in vivo* effects of recombinant ZAG and the  
393  $\beta_{3/2}$ -agonist BRL35135 in ob/ob mice [75] and showed that, although there were similarities  
394 with previous published work, ZAG definitely did not behave as a  $\beta_{3/2}$ -agonist. Compared  
395 with the immediate effect of recognised  $\beta_{3/2}$ -agonists, the ZAG-mediated effect took several  
396 days. This correlates with the delayed lipolytic effect of ZAG compared with isoproterenol in  
397 3T3-L1 cells (  
398 Fig. 5, A).  $\beta_{3/2}$ -agonists also led to a downregulation of  $\beta$ -adrenoreceptors, which was not  
399 observed with ZAG [75].

400 Due to this inconsistency in how ZAG function is understood, a more direct approach was  
401 followed in this study to identify an interaction partner. The identification of AOC3 in this role  
402 highlights new possibilities for ZAG signaling and previously unsuspected functional  
403 relationships. To date, the only ligands known to interact with AOC3 are the sialic acid-binding  
404 immunoglobulin-type lectins Siglec-9 and Siglec-10 [76,77]. Interestingly, Siglec-10 serves as  
405 a substrate for AOC3, which deaminates an arginine residue [77]. AOC3 is an ectoenzyme and  
406 is strongly expressed on the surface of adipocytes and, during inflammation, on endothelial  
407 cells. On adipocytes, it comprises 2.3% of total plasma membrane protein [78]. On endothelial  
408 cells, it promotes leukocyte adhesion and transmigration to sites of inflammation, which is not  
409 restricted to a specific immune cell population [44]. Leukocyte transmigration in AOC3 k.o.  
410 mice is massively hampered, leading to abnormal leukocyte traffic [47] and strongly reduced  
411 leukocyte infiltration into adipose tissue [48]. AOC3 appears to have both catalytic and  
412 adhesive functions, although the molecular mechanism mediating leukocyte migration is  
413 incompletely understood. On the one hand, leukocyte adhesion is blocked by anti-AOC3  
414 antibodies that do not inhibit enzyme activity. On the other hand, inactivation of the enzyme  
415 by a single point mutation – which is critical for enzyme activity – renders AOC3 unable to  
416 promote leukocyte migration [79]. AOC3 has also been shown to play a role in liver, lung and

417 kidney fibrosis [80–82]. Treatment with the AOC3 inhibitor semicarbazide significantly  
418 reduced kidney fibrosis in a unilateral ureteric obstruction model in mice. Inhibition of AOC3  
419 activity led to suppression of matrix gene expression, interstitial inflammation, oxidative stress,  
420 and total collagen accumulation [82]. This matches the outcome in experimentally induced  
421 kidney fibrosis in ZAG k.o. mice [43]. ZAG deficiency leads to severe fibrosis, which can be  
422 rescued by injecting recombinant ZAG. If pharmacological inhibition of AOC3 blocks fibrosis,  
423 ZAG-dependent inhibition of AOC3 might produce a similar outcome [43]. Hence, AOC3 and  
424 ZAG are co-regulators for the development of fibrosis and ZAG-dependent inhibition of AOC3  
425 might serve to attenuate this process.

426 Obesity is associated with adipose tissue inflammation and concomitant insulin resistance [83].  
427 Obese patients have markedly reduced plasma concentrations of ZAG [84], which is explained  
428 by the elevated levels of TNF- $\alpha$  secreted by tissue-resident and activated macrophages [83].  
429 Lean and healthy subjects have a higher plasma ZAG level and show no tissue inflammation  
430 [85]. From this perspective, it would be of interest to ask whether the reduced level of plasma  
431 ZAG observed in obese individuals results in reduced occupation of AOC3 on the surface of  
432 cells. If this were the case, more AOC3 molecules would be available for leukocyte adhesion  
433 and transmigration, which would promote insulin resistance. Enhanced plasma levels of ZAG  
434 might reduce inflammation-dependent transmigration and ameliorate its negative side effects,  
435 as already shown for chronically-administered AOC3 inhibitors [86]. Hence, it is tempting to  
436 speculate that increased or reduced levels of ZAG inversely correlate with the degree of  
437 inflammation observed in lean and obese people suffering from insulin resistance.

438 Similar logic could also explain the increased levels of ZAG observed in people suffering from  
439 cachexia. ZAG is one of the most prominent clinical markers of cachexia, which is highly  
440 upregulated during this energy-demanding state. However, inflammation of white adipose  
441 tissue is not observed in patients suffering from cancer cachexia [87]. Nevertheless, unlike

442 healthy controls and cancer patients not suffering weight loss, IL-6 plasma levels were strongly  
443 elevated [87], which fits the observation that ZAG expression is stimulated by hormones such  
444 as IL-8, leptin and IL-6 [88]. If ZAG is able to regulate leukocyte transmigration by binding to  
445 AOC3, elevated ZAG levels might act to prevent pronounced tissue inflammation and  
446 concomitant insulin resistance during cachexia.

447 The deamination of primary amines by AOC3 generates H<sub>2</sub>O<sub>2</sub>, which is known to activate  
448 insulin signaling [57]. Indeed, in AOC3-deficient mice, the stimulation of glucose uptake by  
449 AOC3 substrates is abolished, whereas insulin-stimulated glucose uptake remains unaffected  
450 [89]. Furthermore, acute and chronic administration of benzylamine increases glucose uptake  
451 in non-diabetic and diabetic rat models [90]. Inhibitors of AOC3 were also shown to have  
452 anti-obesity effects. Chronic administration of AOC3 inhibitors led to a reduced gain of fat  
453 adipose tissue in different mouse models on a high fat diet [91,92]. These findings support  
454 the indirect lipolytic effect of LJP1586 and ZAG by reduced deamination of lipolytic  
455 biogenic amines, as observed with octopamine in 3T3-L1 cells (  
456 Fig. 5, G and H). However, this contradicts the observation that AOC3 k.o. mice have a  
457 significantly enlarged fat tissue mass compared with wt littermates [89]. In this regard, it should  
458 be noted that pharmacological inhibition does not always reflect a k.o. model [93] and  
459 undefined long-term counter regulation of the nervous system cannot be excluded.

460 AOC3 substrates have been shown to inhibit lipolysis in isolated adipocytes [94], whereas  
461 ZAG is purported to stimulate lipolysis by binding to the  $\beta_2$  and  $\beta_3$  adrenoreceptors [72].

462 Using H<sub>2</sub>O<sub>2</sub> as a signaling molecule, ZAG-mediated inhibition of AOC3 might serve as an  
463 alternative explanation of its lipolytic effect (  
464 Fig. 5). AOC3 substrates exert an insulin-like effect on adipocytes, and this is dependent on  
465 the formation of H<sub>2</sub>O<sub>2</sub> [95]. H<sub>2</sub>O<sub>2</sub> is a highly prevalent reactive oxygen species that controls

466 enzyme activity by modulating the redox state of cysteine residues [96]. H<sub>2</sub>O<sub>2</sub> is nonpolar and  
467 able to diffuse through membranes or is transported through aquaporin 3 [97,98]. Although  
468 H<sub>2</sub>O<sub>2</sub> is found throughout the cell, its signaling function is restricted and transduced by  
469 compartmentalization of antioxidant enzymes such as the peroxiredoxins [99]. Accordingly,  
470 AOC3-derived H<sub>2</sub>O<sub>2</sub> could interfere with enzymes involved in stimulating lipolysis.  
471 Important components of this pathway are membrane-bound adenylate cyclase (AC), which  
472 generates cyclic adenosine monophosphate (cAMP), and the catalytic subunit of protein  
473 kinase A (PKA-C). Enhanced levels of cAMP bind to the regulatory unit of PKA, thereby  
474 releasing PKA-C, which in turn phosphorylates downstream elements, inducing lipolysis  
475 [61]. H<sub>2</sub>O<sub>2</sub> increases levels of G( $\alpha$ )i – which reduces AC activity [100] – whereas PKA-C  
476 itself is inactivated by H<sub>2</sub>O<sub>2</sub> [101,102]. Hence, binding of ZAG to AOC3 on adipocytes could  
477 potentially trigger lipolysis by reducing insulinogenic concentrations of H<sub>2</sub>O<sub>2</sub> or by  
478 deamination of lipolytic biogenic amines, as observed in 3T3-L1 cells incubated with  
479 recombinant ZAG (  
480 Fig. 5, A). AOC3/ZAG-dependent signaling could also involve trace amine-associated  
481 receptors (TAARs) [103], which form a subfamily of rhodopsin G-protein coupled receptors  
482 (GPCR). An important part of this signaling pathway is the heterotrimeric G-protein G<sub>s</sub>, which  
483 is activated upon stimulation of GPCRs and promotes cAMP-dependent signaling by activating  
484 AC. Interestingly, G<sub>s</sub> is also associated with TAAR1. Therefore, indirect activation of TAAR1  
485 due to higher concentrations of trace amines such as octopamine, which is released by platelets  
486 [104], or any other trace amine cannot be excluded. Notably, noradrenaline, serotonin,  
487 histamine and dopamine are also described as agonists of TAAR1 [105]. In this regard, two  
488 aspects are of interest. First, a physiological concentration of ZAG (50  $\mu$ g/ml) shows almost  
489 the same inhibitory potential as the highly selective inhibitor LJP1586 (Fig. 2, F and G).  
490 Second, a similar concentration of ZAG is sufficient to enhance octopamine-stimulated

491 lipolysis in the low-micromolar range. Trace amine concentrations in plasma are also in the  
492 low- to sub-micromolar range [104,106]. Therefore, AOC3/ZAG-dependent changes in trace  
493 amine concentrations could strongly affect TAAR signaling.

494 Regarding octopamine-stimulated lipolysis in the presence of LJP1586 and ZAG (Fig. 6), it is  
495 notable that, compared with LJP1586, ZAG loses its stimulatory effect at higher octopamine  
496 concentrations. This difference in behavior of ZAG and LJP1586 might reflect different types  
497 of inhibition. LJP1586 is a small molecule inhibitor that enters the catalytic site of the enzyme  
498 and is highly selective for AOC3 [30,107,108]. ZAG behaves like an allosteric inhibitor, i.e. it  
499 binds away from the active site, and reduces substrate affinity. On the one hand, AOC3-derived  
500 H<sub>2</sub>O<sub>2</sub> is described as affecting its own enzyme activity [109,110]: the crystal structure of human  
501 AOC3 reveals a vicinal disulfide bridge [49], which is suggested to serve as a redox switch,  
502 possibly inducing a conformational change [111]. On the other hand, human ZAG contains one  
503 disulfide bridge in its MHC-fold and one inter-sheet disulfide bridge in the immunoglobulin  
504 (Ig)-like domain. Oxidation of disulfides by H<sub>2</sub>O<sub>2</sub> and one- or two-electron oxidants at  
505 physiological pH results in the formation of disulfide monoxides or disulfide dioxides, which  
506 further leads to cleavage of disulfides and the formation of sulfonic acid [112–114]. Notably,  
507 copper-containing amine oxidases also form hydroxyl radicals (one-electron oxidants) due to  
508 the reaction between H<sub>2</sub>O<sub>2</sub> and reduced copper [115]. Extracellular proteins mainly contain  
509 disulfides [116] and are exposed to a higher level of ROS in general [117]. Modification of the  
510 disulfides in receptors and plasma proteins is involved in protein stability [118], protein  
511 oligomerization [119], the transformation of biological function [120,121] and receptor-ligand  
512 interaction [122]. A similar interplay between ROS signaling, ligand recognition and protein-  
513 protein interaction is imaginable for AOC3 and ZAG, which could restrict the inhibitory  
514 function of ZAG. To test whether AOC3 activity affects protein-protein interaction, wt and  
515 different glycoforms of recombinant ZAG were incubated with benzylamine in the presence or

516 absence of recombinant AOC3 (Supplemental Fig. 3). In the presence of AOC3, only wt ZAG  
517 shifts to a higher molecular weight, whereas in the absence of AOC3 it does not. By contrast,  
518 incubation with H<sub>2</sub>O<sub>2</sub> induces a shift in wt ZAG, irrespective of whether AOC3 is present. This  
519 could hint at an oxidation-dependent oligomerization of ZAG, influencing AOC3/ZAG and/or  
520 ZAG/ZAG protein-protein interaction, in which glycosylation plays an additional role. ZAG  
521 oligomerization could serve as a self-regulatory mechanism, and explain why a complete  
522 inhibition of activity was never observed at an equimolar ratio of both proteins (Fig. 2, C), as  
523 well as why ZAG loses its lipolysis-stimulatory effect (Fig. 6).

524 Besides H<sub>2</sub>O<sub>2</sub>, NH<sub>3</sub> might also serve as a signaling molecule. Compared with H<sub>2</sub>O<sub>2</sub>, less is  
525 known about its function in this context. NH<sub>3</sub> is known to stimulate autophagy, playing an  
526 important role in energy metabolism in tumor cells [123]. In summary, H<sub>2</sub>O<sub>2</sub> and perhaps also  
527 NH<sub>3</sub> may have currently uncharacterized effects on AOC3 activity – with or without ZAG  
528 modulation – that interfere with signaling pathways. This represents a challenge to researchers  
529 to identify physiological compounds serving as substrates for AOC3.

530 During this study, many different expression hosts were tested to find a way to express both  
531 AOC3 and ZAG in sufficient, biologically active quantities. Specifically, a surprising  
532 difference between HEK293 and Expi293F was observed. Both derive from the same attached  
533 cell line, but the latter has been adapted to grow in suspension. Compared with HEK293 cells,  
534 overexpression of ZAG in Expi293F cells results in a hyperglycosylated and – to a lesser extent  
535 – hypoglycosylated form (Fig. 8, A2). Different glycosylated forms of ZAG were previously  
536 identified by isoelectric focusing and are found in plasma, amniotic fluid, saliva and tears [64].  
537 The carbohydrate content of human plasma-derived ZAG makes up to 12-15% of total mass  
538 [65]. By contrast, human seminal fluid-derived ZAG contains no carbohydrate [124]. One  
539 publication analyzed murine ZAG of plasma and different tissues by WB. Interestingly, ZAG

540 had different molecular weights in most tissues and plasma [47]. This is in line with the  
541 observation that plasma ZAG from different mouse strains also shows no coherent pattern (Fig.  
542 8, D). Tunicamycin, BAGN and PNGase F treatment of purified ZAG proteins confirmed that  
543 size differences originate from N-glycosylation. Strikingly, the addition of 500  $\mu\text{M}$   $\text{CoCl}_2$  – a  
544 hypoxia mimetic that stabilizes the transcription factor HIF1- $\alpha$  – reverses this effect (Fig. 8,  
545 A3 and A4). Glycosylation of proteins is highly variable among individuals and is influenced  
546 by oxygen levels. For instance, hypoxia has been shown to reduce uridine diphosphate N-  
547 acetyl-glucosamine (UDP-GlcNAC) levels [125]. This fact is explained by HIF1- $\alpha$ -induced  
548 transcription of pyruvate dehydrogenase kinase (PDK) and inactivation of pyruvate  
549 dehydrogenase by PDK. As a result, production of acetyl-CoA (coenzyme A) is suppressed,  
550 such that acetylation of glucosamine and biosynthesis of UDP-GlcNAC are reduced [126].  
551 Hypoxia also limits production of nucleotides such as ATP, GTP, UTP and CTP, which might  
552 also interfere with the addition of UDP to GlcNAC [127]. Hence, a higher oxygen level causes  
553 the opposite effects, as observed with Expi293F cells. Differences in the carbohydrate content  
554 of plasma ZAG and seminal fluid ZAG are thought to affect physiological function [124]. The  
555 interdependence of glycosylation and physiological function has been described for many other  
556 proteins [50]. For example, glycoproteomic profiling of glycodelin revealed different isoforms,  
557 each of which contains unique carbohydrates associated with different functions involved in  
558 capacitation, acrosome reaction, immune suppression or apoptosis [128–132]. This finding  
559 might support the idea that hyperglycosylated ZAG, which is produced when overexpressed in  
560 Expi293F cells and shows markedly reduced inhibition of AOC3 activity (Fig. 8, C),  
561 corresponds to one specific *in vivo* glycoform and thus might have a particular physiological  
562 impact. Modification of the carbohydrate content of recombinant ZAG in the presence of  $\text{CoCl}_2$   
563 provokes the notion that differences in ZAG glycosylation are co-regulated by oxygen-sensing  
564 factors and that these differences affect biological function *in vivo*. Diseases associated with a



565 rise in ZAG levels, such as cancer, AIDS [37] and chronic heart and kidney disease  
566 [40,133,134], often manifest dyspnea due to highly interdependent symptoms such as fatigue,  
567 physical impairment, pulmonary hypertension, lung infections and heart failure [135–137]. It  
568 would be interesting to observe whether overall oxygen saturation affects the glycosylation  
569 pattern of ZAG. Moreover, a paraneoplastic syndrome such as cachexia has also been attributed  
570 to ZAG secretion by tumor cells, which contributes to a rise in plasma ZAG levels [7]. Since  
571 hypoxia is a characteristic feature of solid tumors, it cannot be excluded that this also affects  
572 the glycosylation and biological function of ZAG secreted by tumor cells [138,139]. Clinical  
573 studies on ZAG have been solely based on the quantification of ZAG by qRT-PCR, ELISA or  
574 tissue microarray-based immunohistochemistry. However, the amount of ZAG might not be as  
575 important as the form of its glycosylation. Glycoproteomic profiling or at least precise  
576 estimation of its molecular weight might offer deeper insights into the true biological function  
577 of ZAG. Taken together, the recognition of ZAG as an allosteric inhibitor of ectoenzyme AOC3  
578 should prompt a reinterpretation of ZAG-associated functions, in particular its pro-lipolytic  
579 and anti-inflammatory roles.

## 580 **4 Methods**

### 581 **4.1 Protein expression and purification**

582 *E. coli BL21 (DE3)*: Both human and murine ZAG (without leader sequence) were produced  
583 in *E. coli* after cloning in the expression plasmid pGEX-6P-2 which adds an N-terminal GST -  
584 tag to each recombinant protein, enabling affinity purification using glutathione (GSH)-  
585 Sepharose. Murine ZAG (mZAG fw (XmaI): GCCC 5`GGGGTGCCTGTCCTGCTGTC;  
586 mZAG rev (XhoI): 5`GCTCGAGTTACTGAGGCTGAGCTACAA) and human ZAG (hZAG  
587 fw (XmaI): 5`TCCCGGGGTAAGAATGGTGCCTGTCCT; hZAG rev (XhoI): 5`  
588 TCTCGAGCTAGCTGGCCTCCCAGGGCA) were amplified by PCR from cDNA of murine



589 liver and HEPG2 cells (ATCC Cat# HB-8065, RRID:CVCL\_0027), respectively. *E. coli* cells  
590 (carrying the expression plasmid pGEX-6P-2-hZAG or pGEX-6P-2-mZAG) from glycerol  
591 stocks were freshly streaked on LB medium agar plates containing the appropriate selection  
592 marker. For GST-ZAG overexpression, a 5 ml overnight culture was set up. The following day,  
593 3 ml of the overnight culture was inoculated into 300 ml LB medium and grown to an OD<sub>600</sub>  
594 of around 0.8-1.0. The temperature was reduced to 25°C and cells were induced with 50 µM  
595 IPTG for 3 h. For the isolation of recombinant GST-ZAG, cells were harvested at 4,000 g and  
596 4°C for 10 min and resuspended in 1xPBS supplemented with 10 mM EDTA and lysozyme  
597 (100µg/ml). The suspension was incubated on a rocking plate for 30 min and then frozen at -  
598 80°C. The frozen suspension was thawed in a water bath at 37°C. The viscous cell suspension  
599 was supplemented with 10 mM MgSO<sub>4</sub> and ten units DNase (Roche) and incubated for 5-10  
600 min at 37°C in a water bath. Subsequently, the lysate was centrifuged at 15,000 g and 4°C for  
601 20 min and incubated with 400 µl pre-equilibrated glutathione (GSH)-Sephacrose on an over-  
602 the-top wheel. GSH-Sephacrose was collected by centrifugation and washed with 1xPBS.  
603 Protein was eluted with 10 mM reduced GSH (Sigma) dissolved in 10 mM Tris-HCl, 150 mM  
604 NaCl, pH 8 and dialyzed against 1xPBS.

#### 605 **4.2 Cell culture:**

606 **3T3-L1 cells** (ATCC Cat# CL-173, RRID:CVCL\_0123): Before seeding, multi-well plates  
607 were coated with 0.2% gelatin and left overnight. Cells were grown in DMEM high glucose  
608 (Gibco) supplemented with 10% FCS (Gibco) until two days after becoming confluent. To  
609 stimulate differentiation, the medium was supplemented with 4 µg/ml dexamethasone, 10  
610 µg/ml insulin and 500 µM isobutymethylxanthine (IBMX). After three days, the medium was  
611 replaced with medium supplemented only with insulin (10 µg/ml), which was changed every  
612 second day. After four more days, the insulin concentration was further reduced to a final

613 concentration of 0.2 µg/ml and left until lipid droplets developed. The medium was changed  
614 every third day.

615 **SGBS cells** (RRID:CVCL\_GS28): For differentiation, the following media were prepared: 0F  
616 (DMEM F-12, 1% Biotin, 1% pantothenic acid, 1% penicillin/streptomycin, 10% FCS), 3FCB  
617 Dex/Mix (DMEM F-12, 1% Biotin, 1% pantothenic acid, 1% penicillin/streptomycin, 0.01  
618 mg/ml transferrin, 0.1 µM cortisol, 200 pM tri-iodothyronine, 20 nM human insulin, 0,25 µM  
619 dexamethasone, 500 µM IBMX, 2 µM rosiglitazone), 3FC Dex/Mix (3FCB Dex/Mix without  
620 rosiglitazone) and 3FC (3FC Dex/Mix without dexamethasone and IBMX). 0F medium was  
621 used for cultivating SGBS cells and changed twice per week. For differentiation,  $2 \times 10^5$  cells/10  
622 cm culture dish were seeded and grown until confluency. The growth medium was switched to  
623 3FCB Dex/Mix for three days and changed to 3FC Dex/Mix on the fourth day. On the seventh  
624 and eleventh day, the medium was replaced with 3FC. Lipid droplets developed after two  
625 weeks of differentiation.

626 **HCAECs:** HCAECs (kindly provided by Gunther Marsche) were cultured in six-well plates  
627 coated with 1% gelatin and left overnight. Cells were grown and used for experiments until  
628 they reached the ninth passage. Special medium was provided by Lonza (EGM™-2 MV  
629 Microvascular Endothelial Cell Growth Medium mixed with supplements according to  
630 manufacturer's protocol: hydrocortisone, hFGF-B, VEGF, R3-IGF-1, ascorbic acid, hEGF, and  
631 GA-1000).

632 **HEK293 cells:** HEK293 cells (CLS Cat# 300192/p777\_HEK293, RRID:CVCL\_0045) were  
633 cultured in DMEM high glucose (Gibco) and supplemented with 10% FCS (Gibco). Cells were  
634 split on reaching 80% confluency.

635 **Expi293F cells:** Expi293F cells (RRID:CVCL\_D615, kindly provided by Walter Keller) were  
636 cultivated in a ventilated 125 ml disposable shaker flask (Corning) and maintained on an orbital

637 shaker. Cells were grown in Expi293™ Expression Medium (Gibco) and split 1:10 on reaching  
638 a density of  $5 \times 10^6$  cells/ml.

639 All cells were grown in a CO<sub>2</sub>-controlled incubator with a relative humidity of 90% at 37°C.

#### 640 **4.3 Construction of expression plasmid pSpexMax:**

641 An expression plasmid, pSpexMax, was constructed as shown in Figure 9 for the production  
642 of both murine AOC3 and murine ZAG in mammalian cells. The leader sequence of Ig kappa  
643 light chain was taken from Ohman et al. [48], which directs the protein into the medium. The  
644 SP163 translational enhancer sequence was incorporated upstream of the leader sequence to  
645 promote recombinant protein translation, while the GST-tag, equipped with a cleavage site  
646 (recognised by PreScission Protease; GE Healthcare), was inserted downstream of the leader  
647 to facilitate affinity purification. For large-scale purification of both proteins, the whole  
648 sequence (SP163, I $\kappa$ k, GST and AOC3/ZAG) was amplified by PCR and cloned into the  
649 expression plasmid pLVX-Tight Puro (Clontech), which allows packaging of constructs in a  
650 lentiviral format. Lentivirus versions of pTET-off and pLVX-Tight Puro (AOC3/ZAG) were  
651 used to transduce HEK293 cells.

652 **Production of lentivirus:** For production of lentivirus, Lenti-X™, the HTX Packaging System  
653 (Clontech), was used following the manufacturer's protocol. Briefly, murine AOC3 and murine  
654 ZAG were cloned into the plasmid pLVX-Tight-Puro. For virus production,  $5 \times 10^6$  HEK293T  
655 cells were seeded in a 10 cm dish 24 h before transfection. The Xfect™ Transfection System  
656 (Clontech) was used for transfection of lentiviral plasmids, pLVX-Tight Puro and pTET-Off  
657 (Clontech). After two days, the virus-containing medium was collected and centrifuged at  
658 1,200 g for 2 min. Supernatant was aliquoted and stored at -80°C.

659 **Transduction and selection of HEK293 cells:** Twenty-four hours before transduction, a six-  
660 well plate was seeded with  $3 \times 10^5$  HEK293 cells per well. On the day of transduction, medium

661 was supplemented with 8 µg/ml hexadimethrine bromide (Sigma) and virus. Plates were  
662 centrifuged at 1,200 g and 32°C for one hour and incubated for another 24 h. Subsequently, the  
663 medium was replaced with a medium containing both selection markers, puromycin (2 µg/ml)  
664 and G-418 (400 µg/ml). After selection, conditioned medium and stable cells were analyzed  
665 for protein expression by WB.

666 **Lentivirally transduced HEK293 cells:** Lentivirally transduced HEK293 cells, stably  
667 secreting GST-AOC3 and GST-ZAG, were grown until they became confluent. On every third  
668 day, conditioned medium was collected and stored at -20°C. For protein isolation, 500 ml  
669 frozen medium was thawed and incubated with 200 µl GSH-Sepharose. Subsequently, the  
670 protein was eluted with 10 mM reduced GSH (Sigma) in 10 mM Tris-HCl, pH 8 and 150 mM  
671 NaCl. The purified protein was dialyzed against 1xPBS, the GST-tag was removed by  
672 PreScission Protease and the released protein dialyzed against 1xPBS. Protein integrity was  
673 checked by SDS-PAGE.

674 **Expi293F cells:** Transfections were performed using the ExpiFectamine™ 293 Transfection  
675 Kit (Gibco) following the manufacturer's protocol. Briefly, cells were diluted to a density of  
676  $3 \times 10^6$  cell/ml with a fresh medium. Plasmid DNA (1 µg/ml culture) and ExpiFectamine™ 293  
677 Reagent (Gibco) were diluted in Opti-MEM® I medium (Gibco) and mixed by inverting. After  
678 10 min, the reaction was added to suspension cultures. After 18 h, the enhancer solutions  
679 ExpiFectamine™ 293 Transfection Enhancer 1 and ExpiFectamine™ 293 Transfection  
680 Enhancer 2 (Gibco) were added. After 72 or 96 h, the medium was collected and prepared for  
681 GST affinity purification or WB. Overexpression experiments were performed in 125 ml  
682 disposable shaker flasks or six-well plates.

#### 683 **4.4 Amine oxidase assays:**

684 **AOC3 activity measurement using Amplex Red:** For fluorescent measurement of amine  
685 oxidase activity, AOC3 standard reagent Amplex Red (Invitrogen) was used. The signal was  
686 measured at an excitation/emission ratio of 560/590 nm. All measurements were performed at  
687 37°C by connecting the fluorimeter (DU 640 Spektrometer, Beckman) to a water bath. Only  
688 sterile-filtered 1xPBS was used as a reaction buffer since autoclaving produced non-defined  
689 peroxide species, which caused false positive signals. The standard reaction (500 µl) comprised  
690 50 ng AOC3, 4 µM Amplex Red and two units HRPO (Sigma). For inhibition, the sample was  
691 pre-incubated with LJP1586 (La Jolla Pharmaceuticals) or ZAG for 5 min at 37°C. The reaction  
692 was started by addition of 5 µl 10 mM benzylamine (Sigma) and stopped by adding 10 µl  
693 Amplex™ Red/UltraRed Stop Reagent (Invitrogen).

694 **Radioactive AOC3 assays:** The standard reaction (500 µl) comprised 50 ng AOC3, 100 µM  
695 benzylamine, 1 Ci/mol [<sup>14</sup>C]-benzylamine (PerkinElmer) and 1xPBS. For inhibition, the  
696 sample was pre-incubated with LJP1586 or ZAG for 5 min at 37°C. The sample was incubated  
697 at 37°C in a water bath for 60 min. After incubation, the reaction was stopped by adding 20 µl  
698 of 2 M HCl/ per 100 µl reaction volume followed by 200 µl of extraction solvent (toluene/ethyl  
699 acetate, 1:1, v/v)/ 100 µl reaction volume. Samples were vortexed and centrifuged at 700 g for  
700 10 min, then 200 µl of the upper organic phase (~850 µl) were measured by liquid scintillation  
701 counting.

702 **Radioactive cell culture experiment:** The day before the experiment, stable HEK293 were  
703 seeded at a density of 2.5x10<sup>5</sup> cells/well (6-well plate). 3T3-L1 adipocytes were used when  
704 fully differentiated and HCAEC cells when confluent. For measurement, the cells were  
705 incubated with the corresponding media without FCS supplemented with 100 µM benzylamine  
706 and 1 Ci/mol [<sup>14</sup>C]-benzylamine. For inhibition, cells were pre-incubated with LJP1586 or  
707 ZAG for 15 min. After 30 min incubation, supernatant was collected, extracted and measured

708 according to the standard radioactive AOC3 assay. Cells were washed three times with 1 ml  
709 1xPBS and lysed by incubation with 0.3 M NaOH/1% SDS. Protein amount was quantitated  
710 using BCA reagent.

711 **AOC3 activity measurement using 4-nitrophenylboronic acid pinacol ester (NPBE):** This  
712 is a colorimetric assay based on the oxidation of NPBE in the presence of H<sub>2</sub>O<sub>2</sub> [59]. The  
713 standard reaction (250 µl) comprised 50 mM potassium phosphate buffer pH 7.4, 10 µg AOC3,  
714 150 mM NaCl, 100 µM NPBE (ethanolic solution) and 20 mM substrate. Samples were  
715 incubated at 37°C and stopped by adding 1 mM DTT and 5 µl 5 M NaOH.

#### 716 **4.5 Crosslinking:**

717 Plasma membrane was isolated according to Belsham et al. [140]. The gonadal adipose tissue  
718 of ten C57Bl6 mice (older than 4 months) or differentiated SGBS cells (5x10 cm culture dishes)  
719 were collected and mixed with 1 ml of sucrose-based medium (SBM1) (10 mM Tris-HCl, 0.25  
720 M sucrose, 80 mM EGTA, pH 8.2) and homogenized on ice. Samples were centrifuged for 30  
721 s at 1,000 g, the infranatant was collected with a syringe, pooled and centrifuged at 4°C at  
722 30,000 g for 30 min. The pellet was resuspended in 500 µl SBM1. Two tubes were filled with  
723 8 ml “self-forming gradient of percoll” comprising Percoll (80 mM Tris-HCl pH 8, 2 M  
724 sucrose, 80 mM EGTA), SBM2 (10 mM Tris-HCl pH 8, 0.25 M sucrose, 2 mM EGTA) and  
725 SBM1, mixed in a ratio of 7:1:32 (v/v/v). The resuspended pellet was gently loaded onto the  
726 gradient solution and centrifuged at 4°C and 10,000 g for 15 min. After centrifugation, a fluffy  
727 white band at the bottom was collected with a large gauge needle, washed two times with  
728 1xPBS and pelleted by centrifugation at 10,000 g. The pellet was finally resuspended in 500 µl  
729 0.25 M sucrose dissolved in 1xPBS.

730 Purified proteins were labeled with Sulfo-SBED (Thermo Scientific) according to the  
731 manufacturer’s protocol (Fig. 11). Sulfo-SBED comprises biotin, a sulfated N-

732 hydroxysuccinimide (Sulfo-NHS) active ester and a photoactivatable aryl-azide. Successful  
733 labeling of human or mouse GST-ZAG and GST was confirmed by WB, and labeled proteins  
734 were extensively dialyzed against 1xPBS to eliminate any non-bound Sulfo-SBED molecules.  
735 In a dark room (with red safety light), 100 µg of labeled proteins were mixed with 100 µl of  
736 freshly-isolated membranes in a six-well plate and then wells were filled to a final volume of  
737 500 µl with 1xPBS. Plates were wrapped in aluminum foil and incubated on a rocking plate at  
738 4°C for 1 h. Subsequently, samples were exposed to UV light while cooling on ice. The protein  
739 solutions were transferred to a 1.5 ml tube and delipidated by addition of 0.5% N-octyl-  
740 glucoside. Delipidated proteins were either directly separated by SDS-PAGE or incubated with  
741 50 µl of streptavidin agarose. Agarose-bound proteins were washed four times with 1xPBS,  
742 once with 0.5 M NaCl and then eluted with a 1xSDS loading buffer. Eluted samples were  
743 separated by SDS-PAGE. After SDS-PAGE, samples were either analyzed by WB or Comassie  
744 Brilliant Blue-stained bands were excised with a scalpel and subjected to LC-MS/MS.

#### 745 **4.6 Peptide sequencing by LC-MS/MS:**

746 Excised gel bands were washed with 150 µl distilled H<sub>2</sub>O, 150 µl 50% acetonitrile and 150 µl  
747 100% acetonitrile with a brief centrifugation step in-between. After the last washing step  
748 samples were dried in a vacuum centrifuge. Dehydrated samples were reduced by adding 60 µl  
749 10 mM DTT dissolved in 100 mM NH<sub>4</sub>HCO<sub>3</sub> and incubated at 56°C for 1 h. After cooling, the  
750 supernatant was removed and replaced with 55 mM 2-iodoacetamide dissolved in 100 mM  
751 NH<sub>4</sub>HCO<sub>3</sub>. After 1 h incubation, samples were washed with 100 mM NH<sub>4</sub>HCO<sub>3</sub> and then  
752 dehydrated and swollen by adding 50% acetonitrile and 100 mM NH<sub>4</sub>HCO<sub>3</sub>, respectively.  
753 Treated samples were dried in a vacuum centrifuge. Subsequently, gel pieces were swollen by  
754 a stepwise addition of digestion buffer (50 mM NH<sub>4</sub>HCO<sub>3</sub>, 5 mM CaCl<sub>2</sub>, and 12.5 ng/µl  
755 trypsin) on ice. Samples were covered with a digestion buffer and incubated at 37°C in a  
756 thermomixer overnight. The next day, peptides were extracted by adding 35 µl 1% formic acid



757 and 160  $\mu$ l 2% acetonitrile followed by 35  $\mu$ l 0.5% formic acid and 160  $\mu$ l 50% acetonitrile.  
758 Supernatants were collected and dried in a vacuum centrifuge. Extracted proteins were  
759 resuspended in 0.1% formic acid separated on a nano-HPLC system (Ultimate 3000™, LC  
760 Packings, Amsterdam, Netherlands), with a flow rate of 20  $\mu$ l/min using 0.1% formic acid as  
761 a mobile phase. Loaded samples were transferred to a nano-column (LC Packings C18  
762 PepMap™, 75  $\mu$ m inner diameter x 150 mm) and eluted with a flow rate of 300 nl/min (solvent  
763 A: 0.3% aqueous formic acid solution; solvent B: water/acetonitrile 20/80 (v/v), 0.3% formic  
764 acid; gradient: 5 min 4% solvent B, 35 min 55% solvent B, 5 min 90% solvent B, 47 min 4%  
765 solvent B). Samples were ionized by a Finnigan nano-ESI source, equipped with NanoSpray  
766 tips (PicoTip™ Emitter, New Objective, Woburn, MA). Analysis was performed by Thermo-  
767 Finnigan LTQ linear ion-trap mass-spectrometer (Thermo, San Jose, CA, USA). MS/MS data  
768 were synchronized with the NCBI (26.9.2010) non-redundant public database with  
769 SpectrumMill Rev. 03.03.084 SR4 (Agilent, Darmstadt, GER) software. For identification, at  
770 least three or more different peptide sequences must be detected [141].

#### 771 **4.7 Ion exchange chromatography:**

772 Overnight-fasted mice were anesthetized using isoflurane and blood was collected via the retro-  
773 orbital sinus. Protein from 2 ml collected murine plasma was desalted and rebuffered in 10 mM  
774 Tris-HCl, pH 8 using a PD-10 desalting column (GE Healthcare) and further diluted to a final  
775 volume of 20 ml using 10 mM Tris-HCl, pH 8. Plasma proteins were separated by anion  
776 exchange chromatography using Resource Q column (GE Healthcare, 6 ml) connected to an  
777 ÄKTA Avant 25 system (GE Healthcare). After loading, the column was washed with ten  
778 column volumes of binding buffer and bound proteins were eluted by linear salt gradient (0-  
779 1 M NaCl). The protein concentration of all fractions was measured and ZAG-containing  
780 fractions identified by WB.



781 **4.8 GST pulldown:**

782 GST-tagged AOC3 isolated from the conditioned medium of lentivirally transduced HEK293  
783 cells was incubated with 1:10 diluted murine plasma. The reaction comprised 100  $\mu$ l diluted  
784 murine plasma, 200  $\mu$ l recombinant GST-AOC3 (50  $\mu$ g/ml), 50  $\mu$ l pre-equilibrated GSH-  
785 sepharose and 150  $\mu$ l 1xPBS. The reaction was incubated on an over-the-top wheel, centrifuged  
786 at 700 g for 1 min and then the flow-through was collected. The GSH-sepharose was washed  
787 five times with 500  $\mu$ l 1xPBS and bound proteins were eluted with 1xSDS loading buffer.  
788 Samples were analyzed by WB.

789 **4.9 Glycerol measurement:**

790 The medium of stimulated 3T3-L1 adipocytes was collected and glycerol content measured  
791 using a standard glycerol kit (Sigma). Cells were washed three times with 1xPBS and lysed by  
792 incubation with 0.3 M NaOH and 1% SDS. Protein was quantitated using BCA reagent  
793 (Pierce).

794 **4.10 Western blot:**

795 Proteins were separated by 10% SDS-PAGE according to standard protocols and blotted onto  
796 polyvinylidene fluoride membrane (Carl Roth GmbH). Membranes were blocked with 10%  
797 blotting grade milk powder (Roth) in TST (50 mM Tris-HCl, 150 mM NaCl, 0.1% Tween-20,  
798 pH 7.4) at room temperature for 1 h or at 4°C overnight. Primary antibodies were directed  
799 against GST (GE Healthcare Cat# 27-4577-01, RRID:AB\_771432), murine AOC3 (Abcam  
800 Cat# ab42885, RRID:AB\_946102) and ZAG (Santa Cruz Biotechnology Cat# sc-11245,  
801 RRID:AB\_2290216). Signals were visualized by enhanced chemiluminescence detection  
802 (Clarity Western ECL Substrate, Bio-Rad) and the ChemiDoc Touch Imaging System (Bio-  
803 Rad).

804 **4.11 Statistical analysis:**

805 Statistical analysis and diagrams were prepared using GraphPad Prism 8.0.1 (GraphPad Prism,  
806 RRID:SCR\_002798). Figures and illustrations were prepared using CorelDRAW  
807 2018 (CorelDRAW Graphics Suite, RRID:SCR\_014235).

808 **Author contributions:**

809 MR carried out protein expression and purification, designed and cloned expression plasmids,  
810 created stable cell lines, grew cell lines, designed and performed all cell experiments,  
811 performed and designed all amine oxidase assays and enzyme kinetics, carried out all  
812 AOC3/ZAG interaction studies including ion-exchange chromatography, glycosylation  
813 experiments, cross-linking experiments and preparation of samples for LC-MS/MS peptide  
814 sequencing up to injection into the nano-HPLC system. MR drafted the manuscript and gave  
815 final approval for publication.

816 **Acknowledgments:**

817 I am deeply grateful to Gerhard Hofer (Karl-Franzens-University, Graz) for helping with cell  
818 culture experiments, discussions and proofreading the manuscript, and Roland Viertlmayr (GE-  
819 Healthcare, Munich) for helping with ion exchange chromatography and his invaluable  
820 expertise for substantially improving experiments. I want to thank Friedrich Buck of the core  
821 facility of mass-spectrometry based proteomics, UKE (Hamburg), whose technical advice  
822 contributed decisively to successful peptide sequencing. I want to thank Gerald Rechberger  
823 (Karl-Franzens-University, Graz) for performing LC-MS/MS based peptide sequencing.  
824 Finally, I would like to thank Walter Keller (Karl-Franzens-University, Graz) for providing  
825 Expi293F cells and Gunther Marsche (Medical University, Graz) for providing HCAEC cells.

826

827 **Funding:** Austrian Science Fund (TRP 4 Translational-Research-Programm, P24294, P26166)  
828 and Medizinische Universität Wien (Hans und Blanca Moser Stiftung).

829

830

831

832

833

834

835

836

837

838

839

840

841

842

843

844

845

846

847

848

849

850 **5 References**

- 851 [1] BURGI, W. & SCHMID, K. 1961 Preparation and properties of Zn-alpha 2-glycoprotein of normal  
852 human plasma. *The Journal of biological chemistry* **236**, 1066–1074.
- 853 [2] Mracek, T., Gao, D., Tzanavari, T., Bao, Y., Xiao, X., Stocker, C., Trayhurn, P. & Bing, C. 2010  
854 Downregulation of zinc-{alpha}2-glycoprotein in adipose tissue and liver of obese ob/ob mice  
855 and by tumour necrosis factor-alpha in adipocytes. *The Journal of endocrinology* **204**, 165–172.  
856 (doi:10.1677/JOE-09-0299).
- 857 [3] Selva, D. M., Lecube, A., Hernández, C., Baena, J. A., Fort, J. M. & Simó, R. 2009 Lower zinc-  
858 alpha2-glycoprotein production by adipose tissue and liver in obese patients unrelated to  
859 insulin resistance. *The Journal of clinical endocrinology and metabolism* **94**, 4499–4507.  
860 (doi:10.1210/jc.2009-0758).
- 861 [4] Beck, S. A. & Tisdale, M. J. 2004 Effect of cancer cachexia on triacylglycerol/fatty acid substrate  
862 cycling in white adipose tissue. *Lipids* **39**, 1187–1189.
- 863 [5] Gómez-Ambrosi, J., Zabalegui, N., Bing, C., Tisdale, M. J., Trayhurn, P. & Williams, G. Weight loss  
864 in tumour-bearing mice is not associated with changes in resistin gene expression in white  
865 adipose tissue. *Hormone and metabolic research = Hormon- und Stoffwechselforschung =*  
866 *Hormones et métabolisme* **34**, 674–677. (doi:10.1055/s-2002-38239).
- 867 [6] Frenette, G., Dubé, J. Y., Lazure, C., Paradis, G., Chrétien, M. & Tremblay, R. R. 1987 The major  
868 40-kDa glycoprotein in human prostatic fluid is identical to Zn-alpha 2-glycoprotein. *The*  
869 *Prostate* **11**, 257–270.
- 870 [7] Hale, L. P., Price, D. T., Sanchez, L. M., Demark-Wahnefried, W. & Madden, J. F. 2001 Zinc alpha-  
871 2-glycoprotein is expressed by malignant prostatic epithelium and may serve as a potential  
872 serum marker for prostate cancer. *Clinical cancer research : an official journal of the American*  
873 *Association for Cancer Research* **7**, 846–853.

- 874 [8] Hassan, M. I., Waheed, A., Yadav, S., Singh, T. P. & Ahmad, F. 2008 Zinc alpha 2-glycoprotein: a  
875 multidisciplinary protein. *Mol Cancer Res* **6**, 892–906. (doi:10.1158/1541-7786.MCR-07-2195).
- 876 [9] Sánchez LM, C. A. B. P. & Sánchez LM, Chirino AJ, Bjorkman P. 1999 Crystal structure of human  
877 ZAG, a fat-depleting factor related to MHC molecules. *Science* **283**, 1914–  
878 9&rft\_id=info:doi/10.1126/science.283.5409.1914&rft\_id=info:id/10206894&rft\_id=info:sid/en  
879 .wikidia.org:AZG.
- 880 [10] Sánchez LM, L.-O. C. B. P. & Sánchez LM, López-Otín C, Bjorkman PJ. 1997 Biochemical  
881 characterization and crystalization of human Zn-alpha2-glycoprotein, a soluble class I major  
882 histocompatibility complex homolog. *Proc. Natl. Acad. Sci. U.S.A.* **94**, 4626–  
883 30&rft\_id=info:doi/10.1073/a94.9.4626&rft\_id=info:id/9114041&rft\_id=info:sid/en.wikidia.org:  
884 AZG.
- 885 [11] Kennedy, M. W., Heikema, A. P., Cooper, A., Bjorkman, P. j. & Sanchez, L. M. 2001 Hydrophobic  
886 ligand binding by Zn-alpha 2-glycoprotein, a soluble fat-depleting factor related to major  
887 histocompatibility complex proteins. *The Journal of biological chemistry* **276**, 35008–35013.  
888 (doi:10.1074/jbc.C100301200).
- 889 [12] Hassan, M. I., Kumar, V., Singh, T. P. & Yadav, S. 2008 Purification and characterization of zinc  
890 alpha2-glycoprotein-prolactin inducible protein complex from human seminal plasma. *Journal*  
891 *of separation science* **31**, 2318–2324. (doi:10.1002/jssc.200700686).
- 892 [13] He, N., Brysk, H., Tying, S. K., Ohkubo, I. & Brysk, M. M. 2001 Zinc-alpha(2)-glycoprotein  
893 hinders cell proliferation and reduces cdc2 expression. *Journal of cellular biochemistry.*  
894 *Supplement Suppl 36*, 162–169.
- 895 [14] Zhu, H.-J., Ding, H.-H., Deng, J.-Y., Pan, H., Wang, L.-J., Li, N.-S., Wang, X.-Q., Shi, Y.-F. & Gong,  
896 F.-Y. 2013 Inhibition of preadipocyte differentiation and adipogenesis by zinc- $\alpha$ 2-glycoprotein  
897 treatment in 3T3-L1 cells. *Journal of diabetes investigation* **4**, 252–260. (doi:10.1111/jdi.12046).

- 898 [15] Lei, G., Arany, I., Tying, S. K., Brysk, H. & Brysk, M. M. 1998 Zinc-alpha 2-glycoprotein has  
899 ribonuclease activity. *Archives of biochemistry and biophysics* **355**, 160–164.  
900 (doi:10.1006/abbi.1998.0735).
- 901 [16] Qu, F., Ying, X., Guo, W., Guo, Q., Chen, G., Liu, Y. & Ding, Z. 2007 The role of Zn-alpha2  
902 glycoprotein in sperm motility is mediated by changes in cyclic AMP. *Reproduction (Cambridge,*  
903 *England)* **134**, 569–576. (doi:10.1530/REP-07-0145).
- 904 [17] Liu, Y., Qu, F., Cao, X., Chen, G., Guo, Q., Ying, X., Guo, W., Lu, L. & Ding, Z. 2012 Con A-binding  
905 protein Zn- $\alpha$ 2-glycoprotein on human sperm membrane is related to acrosome reaction and  
906 sperm fertility. *International journal of andrology* **35**, 145–157. (doi:10.1111/j.1365-  
907 2605.2011.01195.x).
- 908 [18] Henshall, S. M., Horvath, L. G., Quinn, D. I., Eggleton, S. A., Grygiel, J. J., Stricker, P. D., Biankin,  
909 A. V., Kench, J. G. & Sutherland, R. L. 2006 Zinc-alpha2-glycoprotein expression as a predictor of  
910 metastatic prostate cancer following radical prostatectomy. *Journal of the National Cancer*  
911 *Institute* **98**, 1420–1424. (doi:10.1093/jnci/djj378).
- 912 [19] Russell, S. T. & Tisdale, M. J. 2005 The role of glucocorticoids in the induction of zinc-alpha2-  
913 glycoprotein expression in adipose tissue in cancer cachexia. *British journal of cancer* **92**, 876–  
914 881. (doi:10.1038/sj.bjc.6602404).
- 915 [20] Sanders, P. M. & Tisdale, M. J. 2004 Effect of zinc-alpha2-glycoprotein (ZAG) on expression of  
916 uncoupling proteins in skeletal muscle and adipose tissue. *Cancer letters* **212**, 71–81.  
917 (doi:10.1016/j.canlet.2004.03.021).
- 918 [21] Choi, J.-W., Liu, H., Shin, D. H., Im Yu, G., Hwang, J. S., Kim, E. S. & Yun, J. W. 2013 Proteomic  
919 and cytokine plasma biomarkers for predicting progression from colorectal adenoma to  
920 carcinoma in human patients. *Proteomics* **13**, 2361–2374. (doi:10.1002/pmic.201200550).

- 921 [22] Bing, C., Russell, S. T., Beckett, E. E., Collins, P., Taylor, S., Barraclough, R., Tisdale, M. J. &  
922 Williams, G. 2002 Expression of uncoupling proteins-1, -2 and -3 mRNA is induced by an  
923 adenocarcinoma-derived lipid-mobilizing factor. *British journal of cancer* **86**, 612–618.  
924 (doi:10.1038/sj.bjc.6600101).
- 925 [23] Freije, J. P., Fueyo, A., Uría, J. & López-Otín, C. 1991 Human Zn-alpha 2-glycoprotein cDNA  
926 cloning and expression analysis in benign and malignant breast tissues. *FEBS letters* **290**, 247–  
927 249.
- 928 [24] Díez-Itza, I., Sánchez, L. M., Allende, M. T., Vizoso, F., Ruibal, A. & López-Otín, C. 1993 Zn-alpha  
929 2-glycoprotein levels in breast cancer cytosols and correlation with clinical, histological and  
930 biochemical parameters. *European journal of cancer (Oxford, England : 1990)* **29A**, 1256–1260.
- 931 [25] Wang, Z., Corey, E., Hass, G. M., Higano, C. S., True, L. D., Wallace, D., Tisdale, M. J. & Vessella,  
932 R. L. 2003 Expression of the human cachexia-associated protein (HCAP) in prostate cancer and  
933 in a prostate cancer animal model of cachexia. *International journal of cancer. Journal*  
934 *international du cancer* **105**, 123–129. (doi:10.1002/ijc.11035).
- 935 [26] Bibby, M. C., Double, J. A., Ali, S. A., Fearon, K. C., Brennan, R. A. & Tisdale, M. J. 1987  
936 Characterization of a transplantable adenocarcinoma of the mouse colon producing cachexia in  
937 recipient animals. *Journal of the National Cancer Institute* **78**, 539–546.
- 938 [27] Bennani-Baiti, N. & Davis, M. P. Cytokines and cancer anorexia cachexia syndrome. *The*  
939 *American journal of hospice & palliative care* **25**, 407–411. (doi:10.1177/1049909108315518).
- 940 [28] Bing, C., Russell, S., Becket, E., Pope, M., Tisdale, M. J., Trayhurn, P. & Jenkins, J. R. 2006  
941 Adipose atrophy in cancer cachexia: morphologic and molecular analysis of adipose tissue in  
942 tumour-bearing mice. *British journal of cancer* **95**, 1028–1037. (doi:10.1038/sj.bjc.6603360).



- 943 [29] Cariuk, P., Lorite, M. J., Todorov, P. T., Field, W. N., Wigmore, S. J. & Tisdale, M. J. 1997  
944 Induction of cachexia in mice by a product isolated from the urine of cachectic cancer patients.  
945 *British journal of cancer* **76**, 606–613.
- 946 [30] Cahlin, C., Körner, A., Axelsson, H., Wang, W., Lundholm, K. & Svanberg, E. 2000 Experimental  
947 cancer cachexia: the role of host-derived cytokines interleukin (IL)-6, IL-12, interferon-gamma,  
948 and tumor necrosis factor alpha evaluated in gene knockout, tumor-bearing mice on C57 Bl  
949 background and eicosanoid-dependent cachexia. *Cancer research* **60**, 5488–5493.
- 950 [31] Anker, S. D. & Coats, A. J. 1999 Cardiac cachexia: a syndrome with impaired survival and  
951 immune and neuroendocrine activation. *Chest* **115**, 836–847.
- 952 [32] Mak, R. H., Ikizler, A. T., Kovesdy, C. P., Raj, D. S., Stenvinkel, P. & Kalantar-Zadeh, K. 2011  
953 Wasting in chronic kidney disease. *Journal of cachexia, sarcopenia and muscle* **2**, 9–25.  
954 (doi:10.1007/s13539-011-0019-5).
- 955 [33] Mitch, W. E. 1998 Robert H Herman Memorial Award in Clinical Nutrition Lecture, 1997.  
956 Mechanisms causing loss of lean body mass in kidney disease. *The American journal of clinical*  
957 *nutrition* **67**, 359–366.
- 958 [34] Eagan, Tomas M L, Gabazza, E. C., D'Alessandro-Gabazza, C., Gil-Bernabe, P., Aoki, S., Hardie, J.  
959 A., Bakke, P. S. & Wagner, P. D. 2012 TNF- $\alpha$  is associated with loss of lean body mass only in  
960 already cachectic COPD patients. *Respiratory research* **13**, 48. (doi:10.1186/1465-9921-13-48).
- 961 [35] Itoh, M., Tsuji, T., Nemoto, K., Nakamura, H. & Aoshiba, K. 2013 Undernutrition in patients with  
962 COPD and its treatment. *Nutrients* **5**, 1316–1335. (doi:10.3390/nu5041316).
- 963 [36] Nagaya, N., Itoh, T., Murakami, S., Oya, H., Uematsu, M., Miyatake, K. & Kangawa, K. 2005  
964 Treatment of cachexia with ghrelin in patients with COPD. *Chest* **128**, 1187–1193.  
965 (doi:10.1378/chest.128.3.1187).

- 966 [37] Hasson, S. S. A., Al-Balushi, M. S., Al Yahmadi, M. H., Al-Busaidi, J. Z., Said, E. A., Othman, M. S.,  
967 Sallam, T. A., Idris, M. A. & Al-Jabri, A. A. 2014 High levels of Zinc- $\alpha$ -2-Glycoprotein among  
968 Omani AIDS patients on combined antiretroviral therapy. *Asian Pacific journal of tropical*  
969 *biomedicine* **4**, 610–613. (doi:10.12980/APJTB.4.201414B126).
- 970 [38] Fearon, K. C. H., Barber, M. D., Moses, A. G., Ahmedzai, S. H., Taylor, G. S., Tisdale, M. J. &  
971 Murray, G. D. 2006 Double-blind, placebo-controlled, randomized study of eicosapentaenoic  
972 acid diester in patients with cancer cachexia. *Journal of clinical oncology : official journal of the*  
973 *American Society of Clinical Oncology* **24**, 3401–3407. (doi:10.1200/JCO.2005.04.5724).
- 974 [39] Welters, I. D., Bing, C., Ding, C., Leuwer, M. & Hall, A. M. 2014 Circulating anti-inflammatory  
975 adipokines High Molecular Weight Adiponectin and Zinc- $\alpha$ 2-glycoprotein (ZAG) are inhibited in  
976 early sepsis, but increase with clinical recovery: a pilot study. *BMC anesthesiology* **14**, 124.  
977 (doi:10.1186/1471-2253-14-124).
- 978 [40] Leal, V. O., Lobo, J. C., Stockler-Pinto, M. B., Farage, N. E., Velarde, G. C., Fouque, D., Leite, M. &  
979 Mafra, D. 2012 Zinc- $\alpha$ 2-glycoprotein: is there association between this new adipokine and body  
980 composition in hemodialysis patients? *Renal failure* **34**, 1062–1067.  
981 (doi:10.3109/0886022X.2012.712859).
- 982 [41] Mracek, T., Ding, Q., Tzanavari, T., Kos, K., Pinkney, J., Wilding, J., Trayhurn, P. & Bing, C. 2010  
983 The adipokine zinc-alpha2-glycoprotein (ZAG) is downregulated with fat mass expansion in  
984 obesity. *Clinical endocrinology* **72**, 334–341. (doi:10.1111/j.1365-2265.2009.03658.x).
- 985 [42] Ceperuelo-Mallafré, V., Näf, S., Escoté, X., Caubet, E., Gomez, J. M., Miranda, M., Chacon, M. R.,  
986 Gonzalez-Clemente, J. M., Gallart, L. & Gutierrez, C. *et al.* 2009 Circulating and adipose tissue  
987 gene expression of zinc-alpha2-glycoprotein in obesity: its relationship with adipokine and  
988 lipolytic gene markers in subcutaneous and visceral fat. *The Journal of clinical endocrinology*  
989 *and metabolism* **94**, 5062–5069. (doi:10.1210/jc.2009-0764).

- 990 [43] Sørensen-Zender, I., Bhayana, S., Susnik, N., Rolli, V., Batkai, S., Baisantry, A., Bahram, S., Sen,  
991 P., Teng, B. & Lindner, R. *et al.* 2015 Zinc- $\alpha$ 2-Glycoprotein Exerts Antifibrotic Effects in Kidney  
992 and Heart. *Journal of the American Society of Nephrology : JASN* **26**, 2659–2668.  
993 (doi:10.1681/ASN.2014050485).
- 994 [44] Ishibe, S. & Cantley, L. G. 2008 Epithelial-mesenchymal-epithelial cycling in kidney repair.  
995 *Current opinion in nephrology and hypertension* **17**, 379–385.  
996 (doi:10.1097/MNH.0b013e3283046507).
- 997 [45] Ishibe, S., Karihaloo, A., Ma, H., Zhang, J., Marlier, A., Mitobe, M., Togawa, A., Schmitt, R.,  
998 Czyczk, J. & Kashgarian, M. *et al.* 2009 Met and the epidermal growth factor receptor act  
999 cooperatively to regulate final nephron number and maintain collecting duct morphology.  
1000 *Development (Cambridge, England)* **136**, 337–345. (doi:10.1242/dev.024463).
- 1001 [46] Kong, B., Michalski, C. W., Hong, X., Valkovskaya, N., Rieder, S., Abiatari, I., Streit, S., Erkan, M.,  
1002 Esposito, I. & Friess, H. *et al.* 2010 AZGP1 is a tumor suppressor in pancreatic cancer inducing  
1003 mesenchymal-to-epithelial transdifferentiation by inhibiting TGF- $\beta$ -mediated ERK signaling.  
1004 *Oncogene* **29**, 5146–5158. (doi:10.1038/onc.2010.258).
- 1005 [47] Rolli, V., Radosavljevic, M., Astier, V., Macquin, C., Castan-Laurell, I., Visentin, V., Guigne, C.,  
1006 Carpene, C., Valet, P. & Gilfillan, S. *et al.* 2007 Lipolysis is altered in MHC class I zinc-alpha(2)-  
1007 glycoprotein deficient mice. *FEBS letters* **581**, 394–400. (doi:10.1016/j.febslet.2006.12.047).
- 1008 [48] Ohman, J., Jakobsson, E., Källström, U., Elmlad, A., Ansari, A., Kalderén, C., Robertson, E.,  
1009 Danielsson, E., Gustavsson, A.-L. & Varadi, A. *et al.* 2006 Production of a truncated soluble  
1010 human semicarbazide-sensitive amine oxidase mediated by a GST-fusion protein secreted from  
1011 HEK293 cells. *Protein expression and purification* **46**, 321–331. (doi:10.1016/j.pep.2005.10.027).

- 1012 [49] Jakobsson, E., Nilsson, J., Ogg, D. & Kleywegt, G. J. 2005 Structure of human semicarbazide-  
1013 sensitive amine oxidase/vascular adhesion protein-1. *Acta crystallographica. Section D,*  
1014 *Biological crystallography* **61**, 1550–1562. (doi:10.1107/S0907444905028805).
- 1015 [50] Clerc, F., Reiding, K. R., Jansen, B. C., Kammeijer, G. S. M., Bondt, A. & Wuhrer, M. 2016 Human  
1016 plasma protein N-glycosylation. *Glycoconjugate journal* **33**, 309–343. (doi:10.1007/s10719-015-  
1017 9626-2).
- 1018 [51] Stolen, C. M., Yegutkin, G. G., Kurkijärvi, R., Bono, P., Alitalo, K. & Jalkanen, S. 2004 Origins of  
1019 serum semicarbazide-sensitive amine oxidase. *Circulation research* **95**, 50–57.  
1020 (doi:10.1161/01.RES.0000134630.68877.2F).
- 1021 [52] Salmi, M., Stolen, C., Jousilahti, P., Yegutkin, G. G., Tapanainen, P., Janatuinen, T., Knip, M.,  
1022 Jalkanen, S. & Salomaa, V. 2002 Insulin-regulated increase of soluble vascular adhesion protein-  
1023 1 in diabetes. *The American journal of pathology* **161**, 2255–2262. (doi:10.1016/S0002-  
1024 9440(10)64501-4).
- 1025 [53] Boomsma, F., Hut, H., Bagghoe, U., van der Houwen, A. & van den Meiracker, A. 2005  
1026 Semicarbazide-sensitive amine oxidase (SSAO): from cell to circulation. *Medical science monitor*  
1027 *: international medical journal of experimental and clinical research* **11**, RA122-6.
- 1028 [54] Dalfó, E., Hernandez, M., Lizcano, J. M., Tipton, K. F. & Unzeta, M. 2003 Activation of human  
1029 lung semicarbazide sensitive amine oxidase by a low molecular weight component present in  
1030 human plasma. *Biochimica et biophysica acta* **1638**, 278–286.
- 1031 [55] Veitenhansl, M., Stegner, K., Hierl, F.-X., Dieterle, C., Feldmeier, H., Gutt, B., Landgraf, R.,  
1032 Garrow, A. P., Vileikyte, L. & Findlow, A. *et al.* 2004 40th EASD Annual Meeting of the European  
1033 Association for the Study of Diabetes : Munich, Germany, 5-9 September 2004. *Diabetologia* **47**,  
1034 A1-A464. (doi:10.1007/BF03375463).

- 1035 [56] Kim, Y.-L., Im, Y.-J., Ha, N.-C. & Im, D.-S. 2007 Albumin inhibits cytotoxic activity of  
1036 lysophosphatidylcholine by direct binding. *Prostaglandins & other lipid mediators* **83**, 130–138.  
1037 (doi:10.1016/j.prostaglandins.2006.10.006).
- 1038 [57] Mercader, J., Iffiu-Soltesz, Z., Brenachot, X., Földi, A., Dunkel, P., Balogh, B., Attané, C., Valet, P.,  
1039 Mátyus, P. & Carpéné, C. 2010 SSAO substrates exhibiting insulin-like effects in adipocytes as a  
1040 promising treatment option for metabolic disorders. *Future medicinal chemistry* **2**, 1735–1749.  
1041 (doi:10.4155/fmc.10.260).
- 1042 [58] Lin, Z., Li, H., Luo, H., Zhang, Y. & Luo, W. 2011 Benzylamine and methylamine, substrates of  
1043 semicarbazide-sensitive amine oxidase, attenuate inflammatory response induced by  
1044 lipopolysaccharide. *International immunopharmacology* **11**, 1079–1089.  
1045 (doi:10.1016/j.intimp.2011.03.002).
- 1046 [59] Su, G., Wei, Y. & Guo, M. Direct Colorimetric Detection of Hydrogen Peroxide Using 4-  
1047 Nitrophenyl Boronic Acid or Its Pinacol Ester. *American Journal of analytical chemistry* **2011**,  
1048 879–884.
- 1049 [60] Yoshioka, M., Kirino, Y., Tamura, Z. & Kwan, T. 1977 Semiquinone radicals generated from  
1050 catecholamines by ultraviolet irradiation. *Chemical & pharmaceutical bulletin* **25**, 75–78.
- 1051 [61] Lafontan, M. & Langin, D. 2009 Lipolysis and lipid mobilization in human adipose tissue.  
1052 *Progress in lipid research* **48**, 275–297. (doi:10.1016/j.plipres.2009.05.001).
- 1053 [62] Carpéné, C., Galitzky, J., Fontana, E., Atgié, C., Lafontan, M. & Berlan, M. 1999 Selective  
1054 activation of beta3-adrenoceptors by octopamine: comparative studies in mammalian fat cells.  
1055 *Naunyn-Schmiedeberg's archives of pharmacology* **359**, 310–321.
- 1056 [63] Kleinau, G., Pratzka, J., Nürnberg, D., Grüters, A., Führer-Sakel, D., Krude, H., Köhrle, J.,  
1057 Schöneberg, T. & Biebermann, H. 2011 Differential modulation of Beta-adrenergic receptor

- 1058 signaling by trace amine-associated receptor 1 agonists. *PloS one* **6**, e27073.  
1059 (doi:10.1371/journal.pone.0027073).
- 1060 [64] Kamboh, M. I. & Ferrell, R. E. 1986 Genetic studies of low-abundance human plasma proteins. I.  
1061 Microheterogeneity of zinc-alpha 2-glycoprotein in biological fluids. *Biochemical genetics* **24**,  
1062 849–857.
- 1063 [65] SCHMID, K. & TAKAHASHI, S. 1964 POLYMORPHISM OF ZINC-ALPHA-2-HUMAN GLYCOPROTEIN.  
1064 *Nature* **203**, 407–408.
- 1065 [66] Gawlitzek, M., Valley, U., Nimtz, M., Wagner, R. & Conradt, H. S. 1995 Characterization of  
1066 changes in the glycosylation pattern of recombinant proteins from BHK-21 cells due to different  
1067 culture conditions. *Journal of biotechnology* **42**, 117–131.
- 1068 [67] Li, X., Robbins, J. W. & Taylor, K. B. 1992 Effect of the levels of dissolved oxygen on the  
1069 expression of recombinant proteins in four recombinant *Escherichia coli* strains. *Journal of*  
1070 *industrial microbiology* **9**, 1–9.
- 1071 [68] Zhang, F., Saarinen, M. A., Itle, L. J., Lang, S. C., Murhammer, D. W. & Linhardt, R. J. 2002 The  
1072 effect of dissolved oxygen (DO) concentration on the glycosylation of recombinant protein  
1073 produced by the insect cell-baculovirus expression system. *Biotechnology and bioengineering*  
1074 **77**, 219–224.
- 1075 [69] Restelli, V., Wang, M.-D., Huzel, N., Ethier, M., Perreault, H. & Butler, M. 2006 The effect of  
1076 dissolved oxygen on the production and the glycosylation profile of recombinant human  
1077 erythropoietin produced from CHO cells. *Biotechnology and bioengineering* **94**, 481–494.  
1078 (doi:10.1002/bit.20875).
- 1079 [70] Ivan, M., Kondo, K., Yang, H., Kim, W., Valiando, J., Ohh, M., Salic, A., Asara, J. M., Lane, W. S. &  
1080 Kaelin, W. G. 2001 HIFalpha targeted for VHL-mediated destruction by proline hydroxylation:

- 1081 implications for O<sub>2</sub> sensing. *Science (New York, N.Y.)* **292**, 464–468.  
1082 (doi:10.1126/science.1059817).
- 1083 [71] Manalo, D. J., Rowan, A., Lavoie, T., Natarajan, L., Kelly, B. D., Ye, S. Q., Garcia, J. G. N. &  
1084 Semenza, G. L. 2005 Transcriptional regulation of vascular endothelial cell responses to hypoxia  
1085 by HIF-1. *Blood* **105**, 659–669. (doi:10.1182/blood-2004-07-2958).
- 1086 [72] Russell, S. T. & Tisdale, M. J. 2012 Role of  $\beta$ -adrenergic receptors in the anti-obesity and anti-  
1087 diabetic effects of zinc- $\alpha$ 2-glycoprotein (ZAG). *Biochimica et biophysica acta* **1821**, 590–599.  
1088 (doi:10.1016/j.bbali.2011.12.003).
- 1089 [73] Zhang, Y., Proenca, R., Maffei, M., Barone, M., Leopold, L. & Friedman, J. M. 1994 Positional  
1090 cloning of the mouse obese gene and its human homologue. *Nature* **372**, 425–432.  
1091 (doi:10.1038/372425a0).
- 1092 [74] Russell, S. T. & Tisdale, M. J. 2011 Studies on the anti-obesity activity of zinc- $\alpha$ 2-glycoprotein in  
1093 the rat. *International journal of obesity (2005)* **35**, 658–665. (doi:10.1038/ijo.2010.193).
- 1094 [75] Wargent, E. T., O'Dowd, J. F., Zaibi, M. S., Gao, D., Bing, C., Trayhurn, P., Cawthorne, M. A., Arch,  
1095 Jonathan R S & Stocker, C. J. 2013 Contrasts between the effects of zinc- $\alpha$ 2-glycoprotein, a  
1096 putative  $\beta$ 3/2-adrenoceptor agonist and the  $\beta$ 3/2-adrenoceptor agonist BRL35135 in C57Bl/6  
1097 (ob/ob) mice. *The Journal of endocrinology* **216**, 157–168. (doi:10.1530/JOE-12-0402).
- 1098 [76] Aalto, K., Autio, A., Kiss, E. A., Elima, K., Nymalm, Y., Veres, T. Z., Marttila-Ichihara, F., Elovaara,  
1099 H., Saanijoki, T. & Crocker, P. R. *et al.* 2011 Siglec-9 is a novel leukocyte ligand for vascular  
1100 adhesion protein-1 and can be used in PET imaging of inflammation and cancer. *Blood* **118**,  
1101 3725–3733. (doi:10.1182/blood-2010-09-311076).
- 1102 [77] Kivi, E., Elima, K., Aalto, K., Nymalm, Y., Auvinen, K., Koivunen, E., Otto, D. M., Crocker, P. R.,  
1103 Salminen, T. A. & Salmi, M. *et al.* 2009 Human Siglec-10 can bind to vascular adhesion protein-1  
1104 and serves as its substrate. *Blood* **114**, 5385–5392. (doi:10.1182/blood-2009-04-219253).

- 1105 [78] Morris, N. J., Ducret, A., Aebersold, R., Ross, S. A., Keller, S. R. & Lienhard, G. E. 1997 Membrane  
1106 amine oxidase cloning and identification as a major protein in the adipocyte plasma membrane.  
1107 *The Journal of biological chemistry* **272**, 9388–9392.
- 1108 [79] Koskinen, K., Vainio, P. J., Smith, D. J., Pihlavisto, M., Ylä-Herttua, S., Jalkanen, S. & Salmi, M.  
1109 2004 Granulocyte transmigration through the endothelium is regulated by the oxidase activity  
1110 of vascular adhesion protein-1 (VAP-1). *Blood* **103**, 3388–3395. (doi:10.1182/blood-2003-09-  
1111 3275).
- 1112 [80] Weston, C. J., Shepherd, E. L., Claridge, L. C., Rantakari, P., Curbishley, S. M., Tomlinson, J. W.,  
1113 Hubscher, S. G., Reynolds, G. M., Aalto, K. & Anstee, Q. M. *et al.* 2015 Vascular adhesion  
1114 protein-1 promotes liver inflammation and drives hepatic fibrosis. *The Journal of clinical*  
1115 *investigation* **125**, 501–520. (doi:10.1172/JCI73722).
- 1116 [81] Marttila-Ichihara, F., Elima, K., Auvinen, K., Veres, T. Z., Rantakari, P., Weston, C., Miyasaka, M.,  
1117 Adams, D., Jalkanen, S. & Salmi, M. 2017 Amine oxidase activity regulates the development of  
1118 pulmonary fibrosis. *FASEB journal : official publication of the Federation of American Societies*  
1119 *for Experimental Biology* **31**, 2477–2491. (doi:10.1096/fj.201600935R).
- 1120 [82] Wong, M., Saad, S., Zhang, J., Gross, S., Jarolimek, W., Schilter, H., Chen, J. A., Gill, A. J., Pollock,  
1121 C. A. & Wong, M. G. 2014 Semicarbazide-sensitive amine oxidase (SSAO) inhibition ameliorates  
1122 kidney fibrosis in a unilateral ureteral obstruction murine model. *American journal of*  
1123 *physiology. Renal physiology* **307**, F908-16. (doi:10.1152/ajprenal.00698.2013).
- 1124 [83] Luca, C. de & Olefsky, J. M. 2008 Inflammation and insulin resistance. *FEBS letters* **582**, 97–105.  
1125 (doi:10.1016/j.febslet.2007.11.057).
- 1126 [84] Garrido-Sánchez, L., García-Fuentes, E., Fernández-García, D., Escoté, X., Alcaide, J., Perez-  
1127 Martinez, P., Vendrell, J. & Tinahones, F. J. 2012 Zinc-alpha 2-glycoprotein gene expression in



- 1128 adipose tissue is related with insulin resistance and lipolytic genes in morbidly obese patients.  
1129 *PloS one* **7**, e33264. (doi:10.1371/journal.pone.0033264).
- 1130 [85] Marrades, M. P., Martínez, J. A. & Moreno-Aliaga, M. J. 2008 ZAG, a lipid mobilizing adipokine,  
1131 is downregulated in human obesity. *Journal of physiology and biochemistry* **64**, 61–66.
- 1132 [86] Salter-Cid, L. M., Wang, E., O'Rourke, A. M., Miller, A., Gao, H., Huang, L., Garcia, A. & Linnik, M.  
1133 D. 2005 Anti-inflammatory effects of inhibiting the amine oxidase activity of semicarbazide-  
1134 sensitive amine oxidase. *The Journal of pharmacology and experimental therapeutics* **315**, 553–  
1135 562. (doi:10.1124/jpet.105.089649).
- 1136 [87] Ryden, M., Agustsson, T., Laurencikiene, J., Britton, T., Sjolín, E., Isaksson, B., Permert, J. &  
1137 Arner, P. 2008 Lipolysis--not inflammation, cell death, or lipogenesis--is involved in adipose.  
1138 *Cancer* **113**, 1695–1704. (doi:10.1002/cncr.23802).
- 1139 [88] Gao, D., Trayhurn, P. & Bing, C. 2010 Macrophage-secreted factors inhibit ZAG expression and  
1140 secretion by human adipocytes. *Molecular and cellular endocrinology* **325**, 135–142.  
1141 (doi:10.1016/j.mce.2010.05.020).
- 1142 [89] Bour, S., Prévot, D., Guigné, C., Stolen, C., Jalkanen, S., Valet, P. & Carpené, C. 2007  
1143 Semicarbazide-sensitive amine oxidase substrates fail to induce insulin-like effects in fat cells  
1144 from AOC3 knockout mice. *Journal of neural transmission (Vienna, Austria : 1996)* **114**, 829–  
1145 833. (doi:10.1007/s00702-007-0671-2).
- 1146 [90] Abella, A., Marti, L., Camps, M., Claret, M., Fernández-Alvarez, J., Gomis, R., Gumà, A., Viguerie,  
1147 N., Carpené, C. & Palacín, M. *et al.* 2003 Semicarbazide-sensitive amine oxidase/vascular  
1148 adhesion protein-1 activity exerts an antidiabetic action in Goto-Kakizaki rats. *Diabetes* **52**,  
1149 1004–1013.
- 1150 [91] Carpené, C., Iffiu-Soltesz, Z., Bour, S., Prévot, D. & Valet, P. 2007 Reduction of fat deposition by  
1151 combined inhibition of monoamine oxidases and semicarbazide-sensitive amine oxidases in

- 1152 obese Zucker rats. *Pharmacological research : the official journal of the Italian Pharmacological*  
1153 *Society* **56**, 522–530. (doi:10.1016/j.phrs.2007.09.016).
- 1154 [92] Mercader, J., Iffiú-Soltész, Z., Bour, S. & Carpéné, C. 2011 Oral Administration of Semicarbazide  
1155 Limits Weight Gain together with Inhibition of Fat Deposition and of Primary Amine Oxidase  
1156 Activity in Adipose Tissue. *Journal of obesity* **2011**, 475786. (doi:10.1155/2011/475786).
- 1157 [93] Weiss, W. A., Taylor, S. S. & Shokat, K. M. 2007 Recognizing and exploiting differences between  
1158 RNAi and small-molecule inhibitors. *Nature chemical biology* **3**, 739–744.  
1159 (doi:10.1038/nchembio1207-739).
- 1160 [94] Prévot, D., Soltesz, Z., Abello, V., Wanecq, E., Valet, P., Unzeta, M. & Carpéné, C. 2007  
1161 Prolonged treatment with aminoguanidine strongly inhibits adipocyte semicarbazide-sensitive  
1162 amine oxidase and slightly reduces fat deposition in obese Zucker rats. *Pharmacological*  
1163 *research : the official journal of the Italian Pharmacological Society* **56**, 70–79.  
1164 (doi:10.1016/j.phrs.2007.04.002).
- 1165 [95] Enrique-Tarancón, G., Marti, L., Morin, N., Lizcano, J. M., Unzeta, M., Sevilla, L., Camps, M.,  
1166 Palacín, M., Testar, X. & Carpéné, C. *et al.* 1998 Role of semicarbazide-sensitive amine oxidase  
1167 on glucose transport and GLUT4 recruitment to the cell surface in adipose cells. *The Journal of*  
1168 *biological chemistry* **273**, 8025–8032.
- 1169 [96] Ying, J., Clavreul, N., Sethuraman, M., Adachi, T. & Cohen, R. A. 2007 Thiol oxidation in signaling  
1170 and response to stress: detection and quantification of physiological and pathophysiological  
1171 thiol modifications. *Free radical biology & medicine* **43**, 1099–1108.  
1172 (doi:10.1016/j.freeradbiomed.2007.07.014).
- 1173 [97] Branco, M. R., Marinho, H. S., Cyrne, L. & Antunes, F. 2004 Decrease of H<sub>2</sub>O<sub>2</sub> plasma  
1174 membrane permeability during adaptation to H<sub>2</sub>O<sub>2</sub> in *Saccharomyces cerevisiae*. *The Journal of*  
1175 *biological chemistry* **279**, 6501–6506. (doi:10.1074/jbc.M311818200).

- 1176 [98] Miller, E. W., Dickinson, B. C. & Chang, C. J. 2010 Aquaporin-3 mediates hydrogen peroxide  
1177 uptake to regulate downstream intracellular signaling. *Proceedings of the National Academy of*  
1178 *Sciences of the United States of America* **107**, 15681–15686. (doi:10.1073/pnas.1005776107).
- 1179 [99] Woo, H. A., Yim, S. H., Shin, D. H., Kang, D., Yu, D.-Y. & Rhee, S. G. 2010 Inactivation of  
1180 peroxiredoxin I by phosphorylation allows localized H<sub>2</sub>O<sub>2</sub> accumulation for cell signaling.  
1181 *Cell* **140**, 517–528. (doi:10.1016/j.cell.2010.01.009).
- 1182 [100] Mbong, N. & Anand-Srivastava, M. B. 2012 Hydrogen peroxide enhances the expression of  
1183 G $\alpha$  proteins in aortic vascular smooth cells: role of growth factor receptor transactivation.  
1184 *American journal of physiology. Heart and circulatory physiology* **302**, H1591-602.  
1185 (doi:10.1152/ajpheart.00627.2011).
- 1186 [101] Humphries, K. M., Juliano, C. & Taylor, S. S. 2002 Regulation of cAMP-dependent protein  
1187 kinase activity by glutathionylation. *The Journal of biological chemistry* **277**, 43505–43511.  
1188 (doi:10.1074/jbc.M207088200).
- 1189 [102] Humphries, K. M., Deal, M. S. & Taylor, S. S. 2005 Enhanced dephosphorylation of cAMP-  
1190 dependent protein kinase by oxidation and thiol modification. *The Journal of biological*  
1191 *chemistry* **280**, 2750–2758. (doi:10.1074/jbc.M410242200).
- 1192 [103] Borowsky, B., Adham, N., Jones, K. A., Raddatz, R., Artymyshyn, R., Ogozalek, K. L., Durkin, M.  
1193 M., Lakhani, P. P., Bonini, J. A. & Pathirana, S. *et al.* 2001 Trace amines: identification of a  
1194 family of mammalian G protein-coupled receptors. *Proceedings of the National Academy of*  
1195 *Sciences of the United States of America* **98**, 8966–8971. (doi:10.1073/pnas.151105198).
- 1196 [104] D'Andrea, G., Terrazzino, S., Fortin, D., Farruggio, A., Rinaldi, L. & Leon, A. 2003 HPLC  
1197 electrochemical detection of trace amines in human plasma and platelets and expression of  
1198 mRNA transcripts of trace amine receptors in circulating leukocytes. *Neuroscience letters* **346**,  
1199 89–92.

- 1200 [105] Miller, G. M. 2011 The Emerging Role of Trace Amine Associated Receptor 1 in the  
1201 Functional Regulation of Monoamine Transporters and Dopaminergic Activity. *Journal of*  
1202 *neurochemistry* **116**, 164–176. (doi:10.1111/j.1471-4159.2010.07109.x).
- 1203 [106] D'Andrea, G., Terrazzino, S., Leon, A., Fortin, D., Perini, F., Granella, F. & Bussone, G. 2004  
1204 Elevated levels of circulating trace amines in primary headaches. *Neurology* **62**, 1701–1705.
- 1205 [107] Foot, J. S., Deodhar, M., Turner, C. I., Yin, P., van Dam, E. M., Silva, D. G., Olivieri, A., Holt, A.  
1206 & McDonald, I. A. 2012 The discovery and development of selective 3-fluoro-4-  
1207 aryloxyallylamine inhibitors of the amine oxidase activity of semicarbazide-sensitive amine  
1208 oxidase/vascular adhesion protein-1 (SSAO/VAP-1). *Bioorganic & medicinal chemistry letters* **22**,  
1209 3935–3940. (doi:10.1016/j.bmcl.2012.04.111).
- 1210 [108] O'Rourke, A. M., Wang, E. Y., Miller, A., Podar, E. M., Scheyhing, K., Huang, L., Kessler, C.,  
1211 Gao, H., Ton-Nu, H.-T. & Macdonald, M. T. *et al.* 2008 Anti-inflammatory effects of LJP 1586 Z-3-  
1212 fluoro-2-(4-methoxybenzyl)allylamine hydrochloride, an amine-based inhibitor of  
1213 semicarbazide-sensitive amine oxidase activity. *The Journal of pharmacology and experimental*  
1214 *therapeutics* **324**, 867–875. (doi:10.1124/jpet.107.131672).
- 1215 [109] Pietrangeli, P., Nocera, S., Fattibene, P., Wang, X., Mondovì, B. & Morpurgo, L. 2000  
1216 Modulation of bovine serum amine oxidase activity by hydrogen peroxide. *Biochem Biophys Res*  
1217 *Commun* **267**, 174–178. (doi:10.1006/bbrc.1999.1925).
- 1218 [110] Pietrangeli, P., Nocera, S., Federico, R., Mondovì, B. & Morpurgo, L. 2004 Inactivation of  
1219 copper-containing amine oxidases by turnover products. *European journal of biochemistry* **271**,  
1220 146–152.
- 1221 [111] Klomsiri, C., Karplus, P. A. & Poole, L. B. 2011 Cysteine-based redox switches in enzymes.  
1222 *Antioxidants & redox signaling* **14**, 1065–1077. (doi:10.1089/ars.2010.3376).

- 1223 [112] Giles, G. I. & Jacob, C. 2002 Reactive sulfur species: an emerging concept in oxidative stress.  
1224 *Biological chemistry* **383**, 375–388. (doi:10.1515/BC.2002.042).
- 1225 [113] Bonifacic, M. & Asmus K.D. 1976 Free Radical Oxidation of Organic Disulfides. *The Journal of*  
1226 *Physical Chemistry*, 2426–2430.
- 1227 [114] Karimi, M., Ignasiak, M. T., Chan, B., Croft, A. K., Radom, L., Schiesser, C. H., Pattison, D. I. &  
1228 Davies, M. J. 2016 Reactivity of disulfide bonds is markedly affected by structure and  
1229 environment: implications for protein modification and stability. *Scientific reports* **6**, 38572.  
1230 (doi:10.1038/srep38572).
- 1231 [115] Castellano, F. N., He, Z. & Greenaway, F. T. 1993 Hydroxyl radical production in the reactions  
1232 of copper-containing amine oxidases with substrates. *Biochimica et biophysica acta* **1157**, 162–  
1233 166.
- 1234 [116] Fahey, R. C., Hunt, J. S. & Windham, G. C. 1977 On the cysteine and cystine content of  
1235 proteins. Differences between intracellular and extracellular proteins. *Journal of molecular*  
1236 *evolution* **10**, 155–160.
- 1237 [117] Ottaviano, F. G., Handy, D. E. & Loscalzo, J. 2008 Redox regulation in the extracellular  
1238 environment. *Circulation journal : official journal of the Japanese Circulation Society* **72**, 1–16.
- 1239 [118] Thornton, J. M. 1981 Disulphide bridges in globular proteins. *Journal of molecular biology*  
1240 **151**, 261–287.
- 1241 [119] Huang, M., Whang, P., Chodaparambil, J. V., Pollyea, D. A., Kusler, B., Xu, L., Felsher, D. W. &  
1242 Mitchell, B. S. 2011 Reactive oxygen species regulate nucleostemin oligomerization and protein  
1243 degradation. *The Journal of biological chemistry* **286**, 11035–11046.  
1244 (doi:10.1074/jbc.M110.208470).

- 1245 [120] Singh, S. K., Thirumalai, A., Pathak, A., Ngwa, D. N. & Agrawal, A. 2017 Functional  
1246 Transformation of C-reactive Protein by Hydrogen Peroxide. *The Journal of biological chemistry*  
1247 **292**, 3129–3136. (doi:10.1074/jbc.M116.773176).
- 1248 [121] Chakraborty, C. & Agrawal, A. 2013 Computational analysis of C-reactive protein for  
1249 assessment of molecular dynamics and interaction properties. *Cell biochemistry and biophysics*  
1250 **67**, 645–656. (doi:10.1007/s12013-013-9553-4).
- 1251 [122] Barbouche, R., Miquelis, R., Jones, I. M. & Fenouillet, E. 2003 Protein-disulfide isomerase-  
1252 mediated reduction of two disulfide bonds of HIV envelope glycoprotein 120 occurs post-CXCR4  
1253 binding and is required for fusion. *The Journal of biological chemistry* **278**, 3131–3136.  
1254 (doi:10.1074/jbc.M205467200).
- 1255 [123] Eng, C. H., Yu, K., Lucas, J., White, E. & Abraham, R. T. 2010 Ammonia derived from  
1256 glutaminolysis is a diffusible regulator of autophagy. *Science signaling* **3**, ra31.  
1257 (doi:10.1126/scisignal.2000911).
- 1258 [124] Ohkubo, I., Niwa, M., Takashima, A., Nishikimi, N., Gasa, S. & Sasaki, M. 1990 Human seminal  
1259 plasma Zn-alpha 2-glycoprotein: its purification and properties as compared with human  
1260 plasma Zn-alpha 2-glycoprotein. *Biochimica et biophysica acta* **1034**, 152–156.
- 1261 [125] Shirato, K., Nakajima, K., Korekane, H., Takamatsu, S., Gao, C., Angata, T., Ohtsubo, K. &  
1262 Taniguchi, N. 2011 Hypoxic regulation of glycosylation via the N-acetylglucosamine cycle.  
1263 *Journal of clinical biochemistry and nutrition* **48**, 20–25. (doi:10.3164/jcbrn.11-015FR).
- 1264 [126] Kim, J.-w., Tchernyshyov, I., Semenza, G. L. & Dang, C. V. 2006 HIF-1-mediated expression of  
1265 pyruvate dehydrogenase kinase: a metabolic switch required for cellular adaptation to hypoxia.  
1266 *Cell metabolism* **3**, 177–185. (doi:10.1016/j.cmet.2006.02.002).

- 1267 [127] Hisanaga, K., Onodera, H. & Kogure, K. 1986 Changes in levels of purine and pyrimidine  
1268 nucleotides during acute hypoxia and recovery in neonatal rat brain. *Journal of neurochemistry*  
1269 **47**, 1344–1350.
- 1270 [128] Chiu, P. C. N., Koistinen, R., Koistinen, H., Seppala, M., Lee, K. F. & Yeung, W. S. B. 2003 Zona-  
1271 binding inhibitory factor-1 from human follicular fluid is an isoform of glycodelin. *Biology of*  
1272 *reproduction* **69**, 365–372. (doi:10.1095/biolreprod.102.012658).
- 1273 [129] Chiu, P. C. N., Koistinen, R., Koistinen, H., Seppala, M., Lee, K.-F. & Yeung, W. S. B. 2003  
1274 Binding of zona binding inhibitory factor-1 (ZIF-1) from human follicular fluid on spermatozoa.  
1275 *The Journal of biological chemistry* **278**, 13570–13577. (doi:10.1074/jbc.M212086200).
- 1276 [130] Chiu, P. C. N., Chung, M.-K., Tsang, H.-Y., Koistinen, R., Koistinen, H., Seppala, M., Lee, K.-F. &  
1277 Yeung, W. S. B. 2005 Glycodelin-S in human seminal plasma reduces cholesterol efflux and  
1278 inhibits capacitation of spermatozoa. *The Journal of biological chemistry* **280**, 25580–25589.  
1279 (doi:10.1074/jbc.M504103200).
- 1280 [131] Clark, G. F., Oehninger, S., Patankar, M. S., Koistinen, R., Dell, A., Morris, H. R., Koistinen, H.  
1281 & Seppälä, M. 1996 A role for glycoconjugates in human development: the human fetto-  
1282 embryonic defence system hypothesis. *Human reproduction (Oxford, England)* **11**, 467–473.
- 1283 [132] Mukhopadhyay, D., Sundereshan, S., Rao, C. & Karande, A. A. 2001 Placental protein 14  
1284 induces apoptosis in T cells but not in monocytes. *The Journal of biological chemistry* **276**,  
1285 28268–28273. (doi:10.1074/jbc.M010487200).
- 1286 [133] Tedeschi, S., Pilotti, E., Parenti, E., Vicini, V., Coghi, P., Montanari, A., Regolisti, G., Fiaccadori,  
1287 E. & Cabassi, A. 2012 Serum adipokine zinc  $\alpha$ 2-glycoprotein and lipolysis in cachectic and  
1288 noncachectic heart failure patients: relationship with neurohormonal and inflammatory  
1289 biomarkers. *Metabolism: clinical and experimental* **61**, 37–42.  
1290 (doi:10.1016/j.metabol.2011.05.011).

- 1291 [134] Philipp, A., Kralisch, S., Bachmann, A., Lossner, U., Kratzsch, J., Blüher, M., Stumvoll, M. &  
1292 Fasshauer, M. 2011 Serum levels of the adipokine zinc- $\alpha$ 2-glycoprotein are increased in chronic  
1293 hemodialysis. *Metabolism: clinical and experimental* **60**, 669–672.  
1294 (doi:10.1016/j.metabol.2010.06.019).
- 1295 [135] Boyton, R. J. 2005 Infectious lung complications in patients with HIV/AIDS. *Current opinion in*  
1296 *pulmonary medicine* **11**, 203–207.
- 1297 [136] Lena, A., Coats, A. J. S. & Anker, M. S. 2018 Metabolic disorders in heart failure and cancer.  
1298 *ESC heart failure* **5**, 1092–1098. (doi:10.1002/ehf2.12389).
- 1299 [137] Salerno, F. R., Parraga, G. & McIntyre, C. W. 2017 Why Is Your Patient Still Short of Breath?  
1300 Understanding the Complex Pathophysiology of Dyspnea in Chronic Kidney Disease. *Seminars in*  
1301 *dialysis* **30**, 50–57. (doi:10.1111/sdi.12548).
- 1302 [138] Silva-Filho, A. F., Sena, W. L. B., Lima, L. R. A., Carvalho, L. V. N., Pereira, M. C., Santos, L. G.  
1303 S., Santos, R. V. C., Tavares, L. B., Pitta, M. G. R. & Rêgo, M. J. B. M. 2017 Glycobiology  
1304 Modifications in Intratumoral Hypoxia: The Breathless Side of Glycans Interaction. *Cellular*  
1305 *physiology and biochemistry : international journal of experimental cellular physiology,*  
1306 *biochemistry, and pharmacology* **41**, 1801–1829. (doi:10.1159/000471912).
- 1307 [139] Vaupel, P. & Mayer, A. 2014 Hypoxia in tumors: pathogenesis-related classification,  
1308 characterization of hypoxia subtypes, and associated biological and clinical implications.  
1309 *Advances in experimental medicine and biology* **812**, 19–24. (doi:10.1007/978-1-4939-0620-  
1310 8\_3).
- 1311 [140] Belsham, G. J., Denton, R. M. & Tanner, M. J. 1980 Use of a novel rapid preparation of fat-cell  
1312 plasma membranes employing Percoll to investigate the effects of insulin and adrenaline on  
1313 membrane protein phosphorylation within intact fat-cells. *The Biochemical journal* **192**, 457–  
1314 467.



1315 [141] Carr, S., Aebersold, R., Baldwin, M., Burlingame, A., Clauser, K. & Nesvizhskii, A. 2004 The  
1316 need for guidelines in publication of peptide and protein identification data: Working Group on  
1317 Publication Guidelines for Peptide and Protein Identification Data. *Molecular & cellular*  
1318 *proteomics : MCP* **3**, 531–533. (doi:10.1074/mcp.T400006-MCP200).

1319

1320 **Figure captions**

1321

1322 **Fig. 1 Analysis of crosslinking experiment, Aa, WB:** Crosslinking samples carrying a biotin  
1323 tag were bound to streptavidin agarose and eluted with 1xSDS. Samples were reduced with  $\beta$ -  
1324 mercaptoethanol and probed with streptavidin; lane 1: GST-tag incubated with plasma  
1325 membrane of murine wt white adipose tissue; lane 2: GST-mZAG incubated with plasma  
1326 membrane of murine wt white adipose tissue; lane 3: GST-hZAG incubated with plasma  
1327 membrane of differentiated SGBS cells. **Ab, WB:** The membrane was stripped and probed  
1328 with  $\alpha$ -GST-antibody; lane 1: GST-tag incubated with plasma membrane of murine wt white  
1329 adipose tissue; lane 2: GST-mZAG incubated with plasma membrane of murine wt white  
1330 adipose tissue; lane 3: GST-hZAG incubated with plasma membrane of differentiated SGBS  
1331 cells. **Ac, WB:** GST-mZAG (lane 1) and crosslinked GST-mZAG without  $\beta$ -mercaptoethanol  
1332 (lane 2). **Ad, Commassie Brilliant Blue-stained SDS gel:** Proteins were separated by SDS-  
1333 PAGE under non-reducing conditions. Corresponding bands were excised with a scalpel and  
1334 prepared for peptide sequencing. Lane 1: plasma membrane; lane 2: plasma membrane with  
1335 GST; lane 3-5: plasma membrane with decreasing amounts of GST-mZAG. **B, Result of LC-  
1336 MS/MS peptide sequencing:** Top five results of one band between 150 kDa and 250 kDa (Ad,  
1337 lane 3). Besides keratin and actin, zinc-alpha2-glycoprotein and semicarbazide-sensitive amine  
1338 oxidase sequences are found (red box). **C, WB of GST-pulldown:** GST and murine GST-  
1339 AOC3 were purified from lentivirally transduced HEK293 cells and incubated with plasma of  
1340 C57Bl6 wt mice. After performing the GST-pulldown experiment proteins were separated by  
1341 SDS-PAGE and blotted proteins detected using  $\alpha$ -GST and  $\alpha$ -ZAG antibody.

1342

1343 **Fig. 2 Enzyme kinetics, A:** Illustration of AOC3 activity measurement; LJP1586: inhibitor;  
1344 HRPO: horse radish peroxidase; crystal structure of AOC3 modified from RCSB PDB, PDB-  
1345 ID: 2C10 [49]. **B, AOC3 saturation curve:** Activity of AOC3 (50 ng) at different  
1346 concentrations of benzylamine. Highest activity indicated by red dashed line (100  $\mu$ M).  $V_{max}$ :  
1347 maximum velocity;  $K_m$ : Michaelis-Menten constant. **C, AOC3/ZAG activity assay:** AOC3  
1348 (50 ng) and ZAG were mixed at different molar ratios. Molecular weights are 42 kDa for ZAG  
1349 ( $MW_{ZAG}$ ) and 84 kDa for AOC3 ( $MW_{AOC3}$ ). Assays and control contained the same amount of  
1350 AOC3. **D, Michaelis-Menten plot:** AOC3 (50 ng) and ZAG, mixed at different ratios, were  
1351 incubated at different substrate concentrations.  $V_{max}$ : maximum velocity;  $K_m$ = Michaelis-  
1352 Menten constant. **E, Lineweaver-Burk diagram:** Allosteric inhibition illustrated by  
1353 intersection of functions with x-axis at the same point (constant  $K_m$ : Michaelis-Menten  
1354 constant).

1355

1356 **Fig. 3 A and B, [ $^{14}$ C]-benzylamine assay:** Differentiated 3T3-L1 cells (A) and HCAECs (B)  
1357 were incubated with increasing amounts of recombinant ZAG. In parallel, cell-derived AOC3  
1358 activity was blocked by adding LJP1586.

1359

1360 **Fig. 4 AOC3-inhibitory effect of plasma-derived ZAG, A, IEX elution diagram and WB:**  
1361 Murine plasma of C57Bl6 mice was collected and rebuffed in 10 mM Tris HCl, pH 8. Plasma  
1362 was separated by ion exchange chromatography (IEX) and eluted by linear NaCl gradient.  
1363 ZAG-containing fractions were identified by WB using  $\alpha$ -ZAG antibody. **B, [ $^{14}$ C]-**  
1364 **benzylamine assay:** ZAG-IEX fractions and no ZAG-IEX fractions were incubated with  
1365 recombinant AOC3 (50 ng). **C, IEX elution diagram and WB:** Comparison of IEX diagram  
1366 and WB of wt and ZAG k.o. plasma. ZAG-containing fractions were identified by WB using

1367  $\alpha$ -ZAG antibody. **D, [<sup>14</sup>C]-benzylamine assay:** IEX fractions (C12 and D1) of wt mice and  
1368 corresponding fractions of ZAG k.o. mice were incubated with recombinant AOC3 (50 ng).  
1369 Data are presented as mean  $\pm$ S.D.: \*\*\*,  $p < 0.001$ .

1370

1371 **Fig. 5 A, Comparison of ZAG- and  $\beta$ -adrenergic agonist-stimulated lipolysis:** Fully  
1372 differentiated 3T3-L1 cells were incubated with ZAG (50  $\mu$ g/ml), GST (50  $\mu$ g/ml), LJP1586  
1373 (10  $\mu$ M) and isoproterenol (10  $\mu$ M). Glycerol release was monitored for two hours. **B, ZAG-**  
1374 **stimulated lipolysis:** Fully differentiated 3T3-L1 cells were incubated with ZAG (50  $\mu$ g/ml),  
1375 GST (50  $\mu$ g/ml) and LJP1586 (10  $\mu$ M). Glycerol release was monitored for twelve hours. **C,**  
1376 **Screen for biogenic amines converted by AOC3:** A set of biogenic amines (20 mM) was  
1377 tested for deamination by recombinant AOC3. Activity was measured by 4-nitrophenyl-  
1378 boronic acid oxidation. Red boxes around names indicate trace amines. **D, Screen for biogenic**  
1379 **amines stimulating lipolysis:** Fully differentiated 3T3-L1 adipocytes were incubated with the  
1380 same set of biogenic amines. Lipolytic activity was measured by glycerol release. Red boxes  
1381 around names indicate trace amines. **E and F, Glycerol release from 3T3-L1 cells:** Lipolytic  
1382 activity of noradrenaline and isoproterenol in the presence and absence of LJP1586 was tested.  
1383 Data are presented as mean  $\pm$ S.D.: \*\*,  $p < 0.01$ ; \*\*\*,  $p < 0.001$ .

1384

1385 **Fig. 6 Stimulated glycerol release from 3T3-L1 cells in the presence of LJP1586 and ZAG,**  
1386 **A and B:** Direct comparison of octopamine-stimulated lipolysis in the presence LJP1586 (10  
1387  $\mu$ M) and ZAG (50  $\mu$ g/ml). Corresponding amounts of GST (26 kDa) purified from HEK293  
1388 cells served as control. Data are presented as mean  $\pm$ S.D.: \*\*,  $p < 0.01$ ; \*\*\*,  $p < 0.001$ .

1389

1390

1391 **Fig. 7 Glycosylation of ZAG, A, WB:** (1) Differences in size of ZAG in individual C57Bl6  
1392 wt mice; (2) Effect of PNGase F treatment on plasma ZAG of wt and ZAG k.o. C57Bl6 mice;  
1393 (3) Murine ZAG overexpressed in HEK293 cells with and without GST-tag; (4)  
1394 Overexpression of GST-ZAG and Flag-ZAG in Expi293F cells. Samples were collected after  
1395 forty-eight and seventy-two hours post transfection (p.t.); (5) Overexpression of GST-ZAG in  
1396 Expi293F cells in the presence of different concentrations of tunicamycin; (6) Overexpression  
1397 of GST-ZAG and Flag-ZAG in Expi293F cells in the presence of tunicamycin (1 µg/ml).  
1398 Samples were collected after forty-eight and seventy-two hours p.t.; (7) Overexpression of  
1399 GST-ZAG in Expi293F cells and sequential treatment with PreScission Protease and PNGase  
1400 F. (\*) and (\*\*) indicate different glycoforms. **B, WB:** Overexpression of GST-ZAG in presence  
1401 of the O-glycosylation inhibitor benzyl-2-acetamido-2-deoxy- $\alpha$ -D-galactopyranoside. Samples  
1402 were collected after forty-eight and seventy-two hours p.t.. Proteins were detected using  $\alpha$ -  
1403 ZAG or  $\alpha$ -GST antibody.

1404

1405 **Fig. 8 Glycosylation of ZAG, A, WB:** (1) Overexpression of wt and glycomutants of Flag-  
1406 ZAG in Expi293F cells. Samples were collected after ninety-six hours post transfection (p.t.);  
1407 (2) Overexpression of wt and glycomutants of Flag-ZAG in Expi293F cells. Samples were  
1408 collected after twenty-four hours p.t.. Asterisks (\*) indicate different glycoforms; (3)  
1409 Overexpression of wt Flag-ZAG in Expi293F cells in the presence of different concentrations  
1410 of the hypoxia mimetic CoCl<sub>2</sub>. Samples were collected after forty-eight hours p.t.; (4)  
1411 Expression of wt and glycomutants of Flag-ZAG in the presence of 500 µM CoCl<sub>2</sub>. Samples  
1412 were collected after ninety-six hours p.t.. **B, WB:** (1) Wt and glycomutants of ZAG  
1413 overexpressed in HEK293 cells. (2) HEK293 cells lentivirally transduced (transd.) with full-  
1414 length AOC3 (i.e. including transmembrane domain). **C, [<sup>14</sup>C]-benzylamine assay:** Inhibitory  
1415 potential of wt and glycomutants of ZAG overexpressed in HEK293 and Expi293F cells. Wt

1416 and ZAG glycomutants were purified from HEK293 and Expi293F cells and incubated with  
1417 HEK293 cells stably expressing murine AOC3 (B, 2). **D, WB:** Plasma proteins (5  $\mu$ g) of mouse  
1418 strains 129, B6N, Balbc, B6Y, DBA and FVB were separated by SDS-PAGE. For each mouse  
1419 strain, plasma was taken from six different male mice (>12 months old). Proteins were detected  
1420 using  $\alpha$ -Flag or  $\alpha$ -ZAG antibody.

1421

1422 **Fig. 9 Construction of expression plasmid pSpexMax:** The pSpexMax expression plasmid  
1423 is largely a combination of pcDNA4/HisMax C and pGEX-6P-2. Partial sequences of  
1424 pcDNA4/HisMax C (T7 promotor and SP163 translational enhancer sequence) and pGEX-6P-  
1425 2 (GST-tag, including cleavage site, and multiple cloning site (MCS)) and the leader sequence  
1426 of Ig kappa light chain were amplified by PCR and ligated by overlap-extension-PCR (OE-  
1427 PCR). The PCR products and pcDNA4/HisMax C were digested with HindIII/XhoI and  
1428 ligated, resulting in pSpexMax. The coding sequences of AOC3 and ZAG (GOI, gene of  
1429 interest) were cloned into the expression plasmid and tested for expression.

1430

1431 **Fig. 10 Coomassie Brilliant Blue-stained SDS gel:** GST-tagged AOC3 (A, lane 1) and GST-  
1432 tagged ZAG (B, lane 1) were affinity purified from the conditioned medium of lentivirally  
1433 transduced HEK293 cells. The GST-tag was removed by PreScission Protease (A and B, lane  
1434 2).

1435

1436 **Fig. 11 Synopsis of the crosslinking experiment, A:** First, murine and human GST-tagged  
1437 ZAG and GST alone were overexpressed in *E. coli* and affinity purified. Plasma membranes  
1438 were isolated from murine adipose tissue and SGBS cells. Purified proteins were labelled with  
1439 Sulfo-SBED and co-incubated with isolated plasma membranes. **B:** GST-ZAG binds to its

1440 interaction partner, whereas GST alone does not. **C:** To stabilize the protein interaction,  
1441 samples were exposed to UV light, inducing the highly reactive aryl azide (red circle, B) to  
1442 form a covalent bond with a nearby amine. After crosslinking, the samples were delipidated  
1443 and bound to streptavidin agarose via the biotin tag (blue square). The red-dotted box indicates  
1444 the GST-ZAG/receptor complex, the blue-dotted box the GST-tag serving as a control. **D:**  
1445 Treated samples were separated by SDS-PAGE. Adding  $\beta$ -mercaptoethanol (reducing agent)  
1446 split the disulfide bond leading to two bands, GST-ZAG (\*) and the unknown protein (\*\*).  
1447 Without  $\beta$ -mercaptoethanol, a shift in MW of GST-ZAG was observed (\*\*\*). For identification  
1448 of the unknown interaction partner, samples were separated by non-reducing SDS-PAGE,  
1449 stained with Coomassie Brilliant Blue and cut into pieces. Proteins extracted from gel slices  
1450 were subjected to LC-MS/MS peptide sequencing.

1451

1452

1453

1454

1455

1456

1457

1458

1459

1460

1461





1464 **Figure 2:**

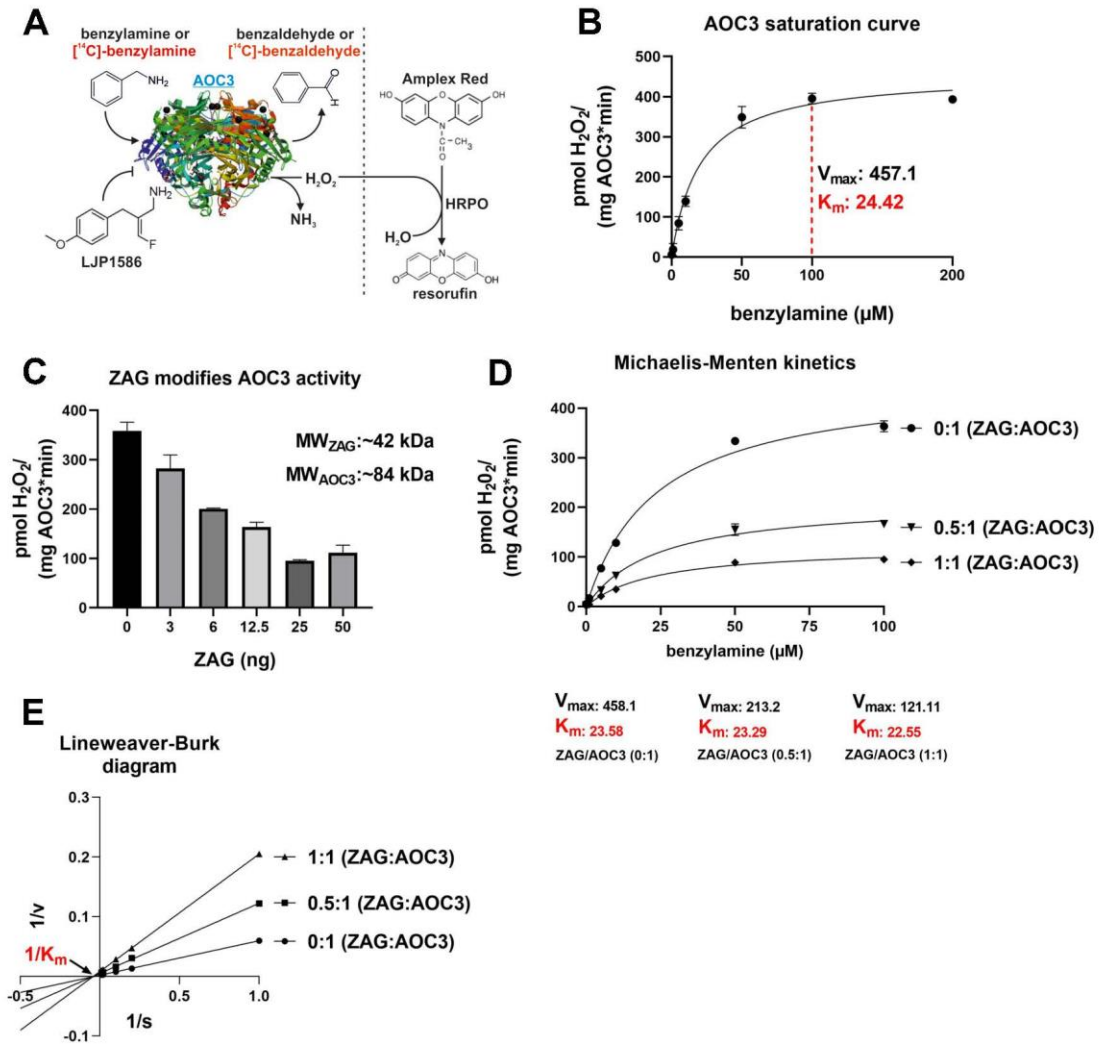

1465

1466

1467

1468

1469

1470 **Figure 3:**

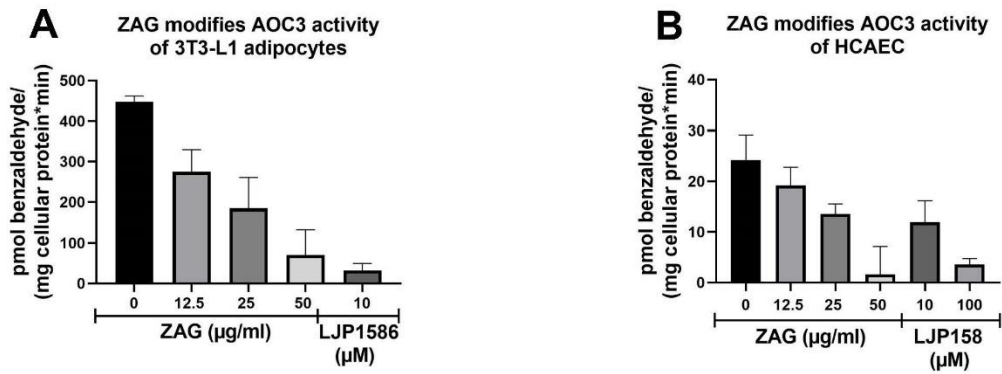

1471

1472

1473

1474

1475

1476

1477

1478

1479

1480

1481

1482

1483 **Figure 4:**

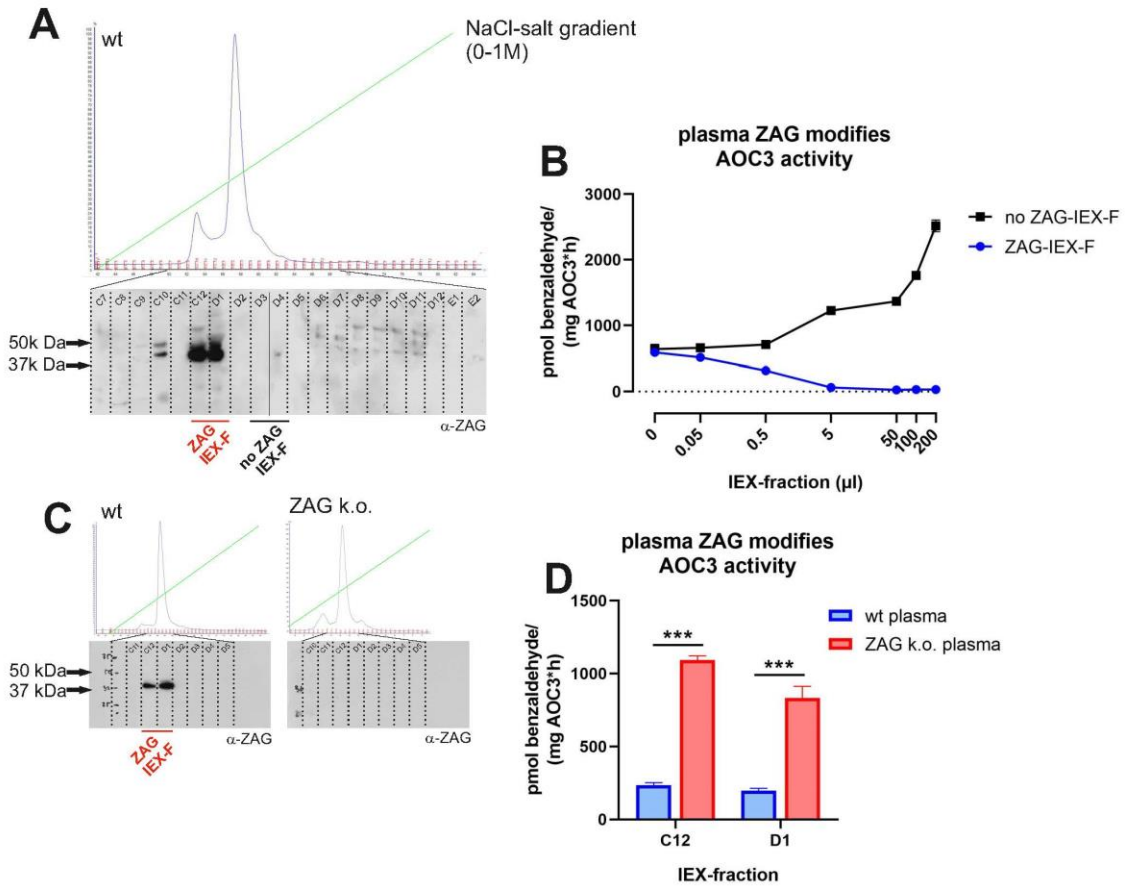

1484

1485

1486

1487

1488

1489

1490

1491

1492

1493 **Figure 5:**

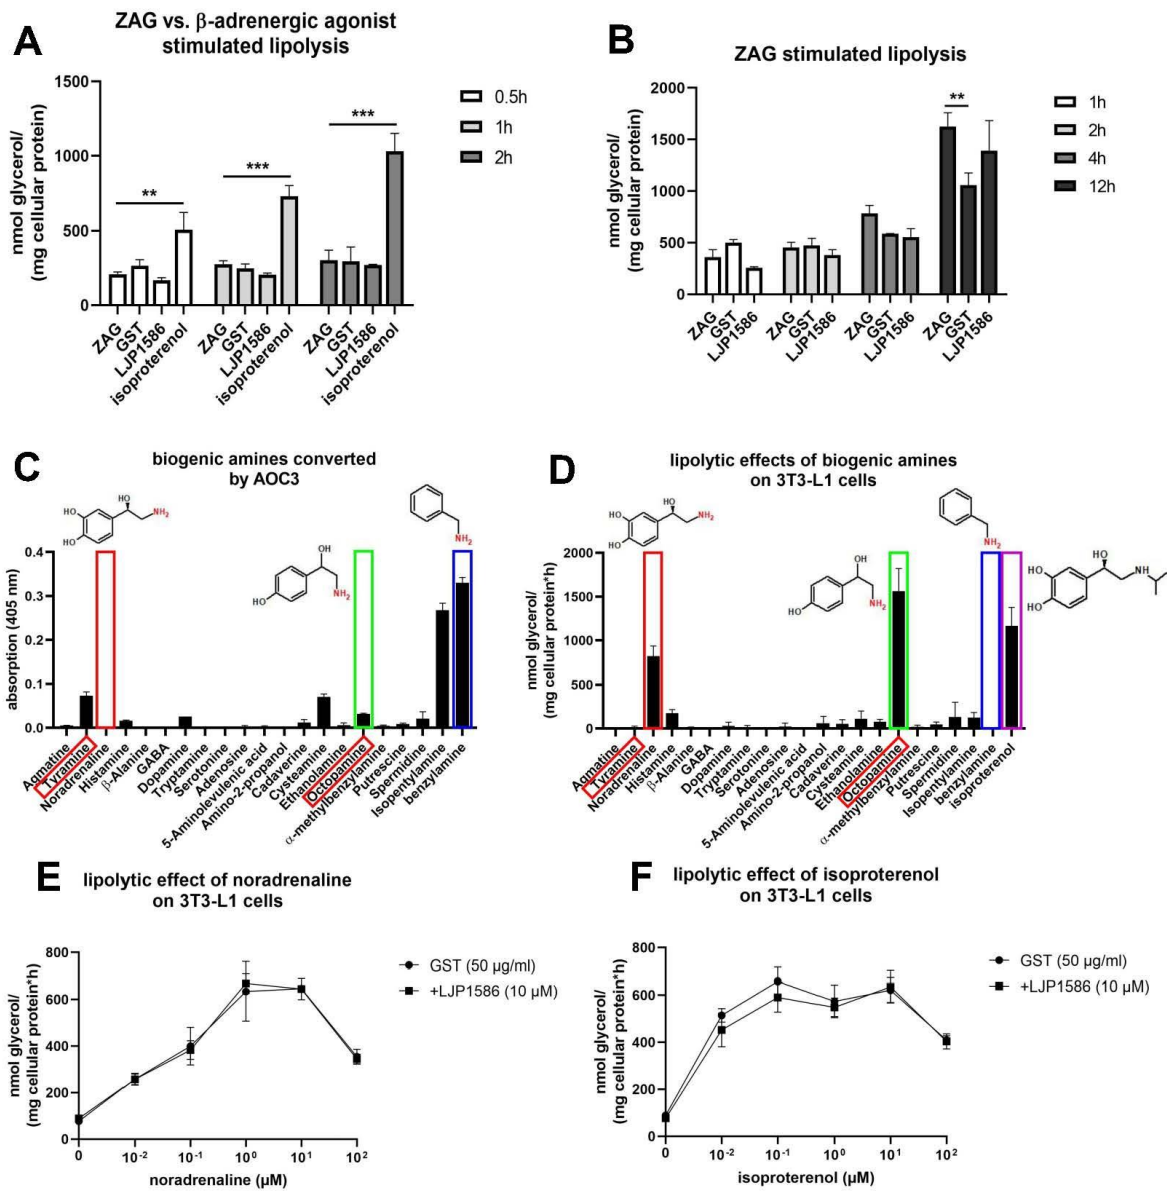

1494

1495 **Figure 6:**

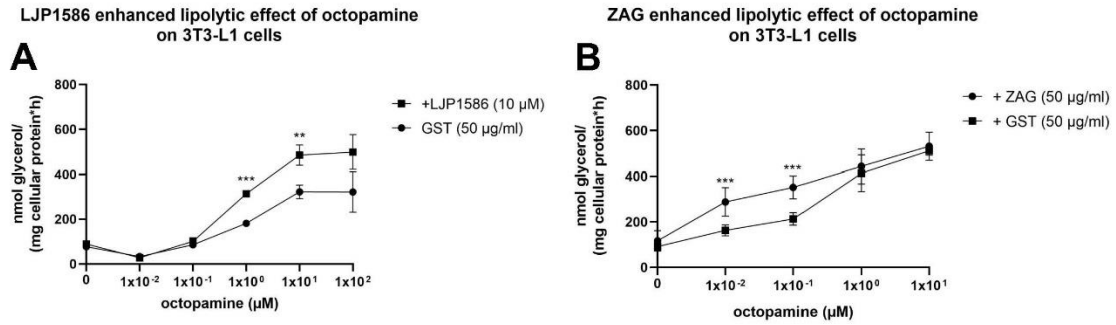

1496

1497

1498

1499

1500

1501

1502

1503

1504

1505

1506

1507

1508

1509 **Figure 7:**

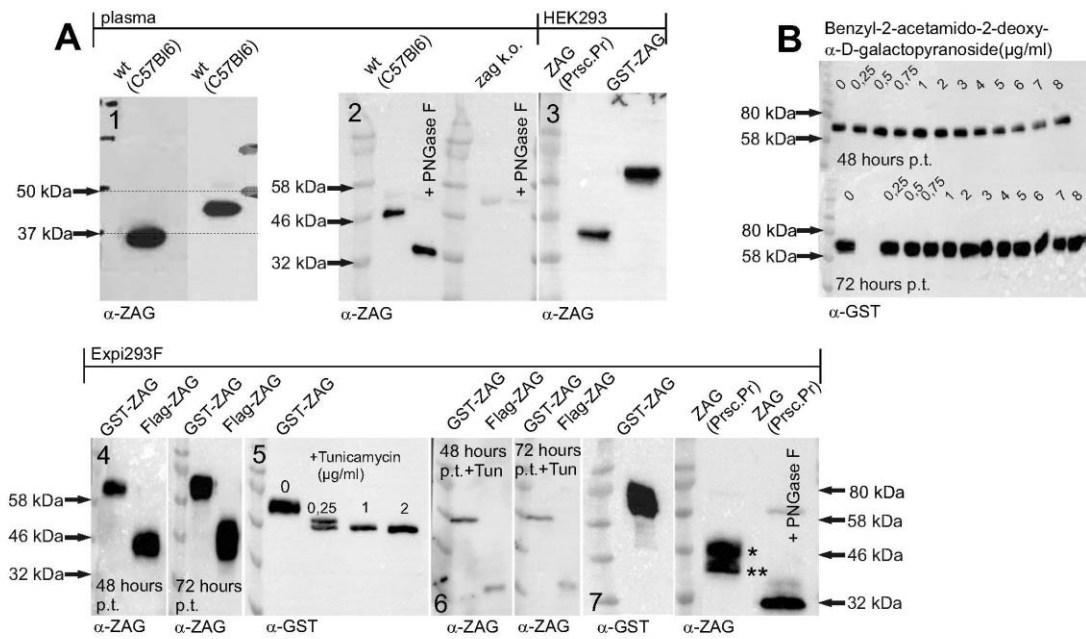

1510

1511

1512

1513

1514

1515

1516

1517

1518

1519

1520 **Figure 8:**

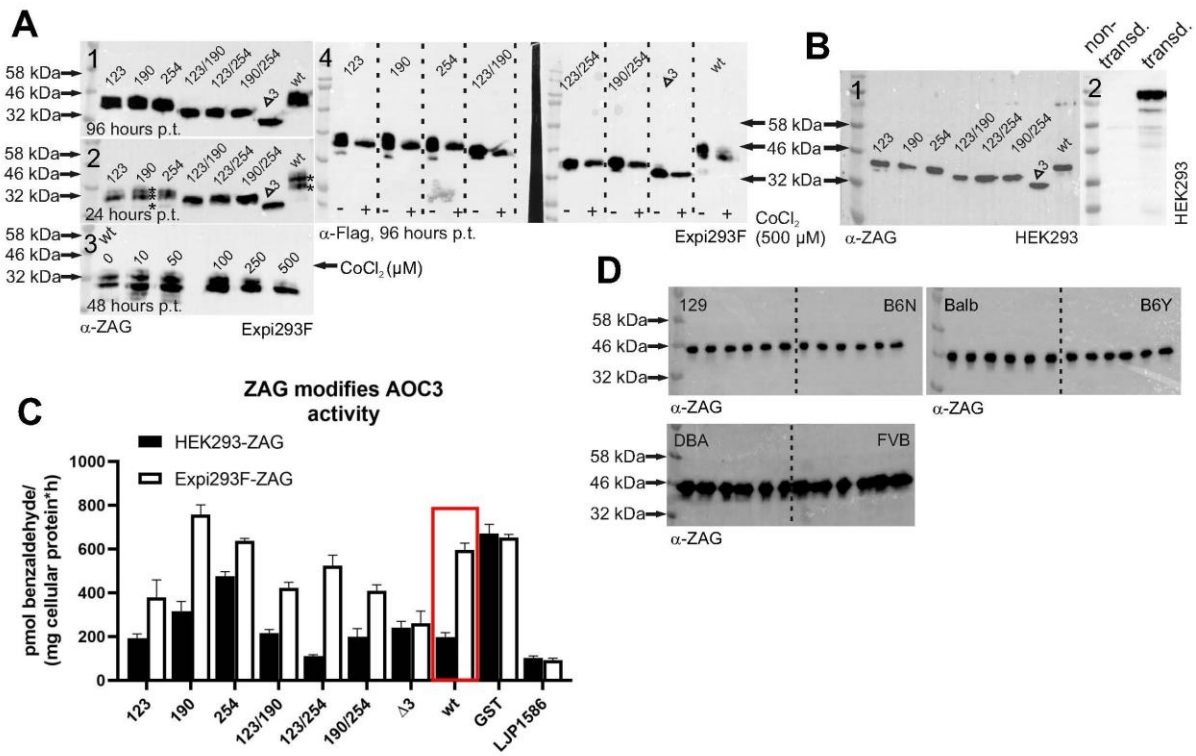

1521

1522

1523

1524

1525

1526

1527

1528

1529

1530

1531 **Figure 9:**

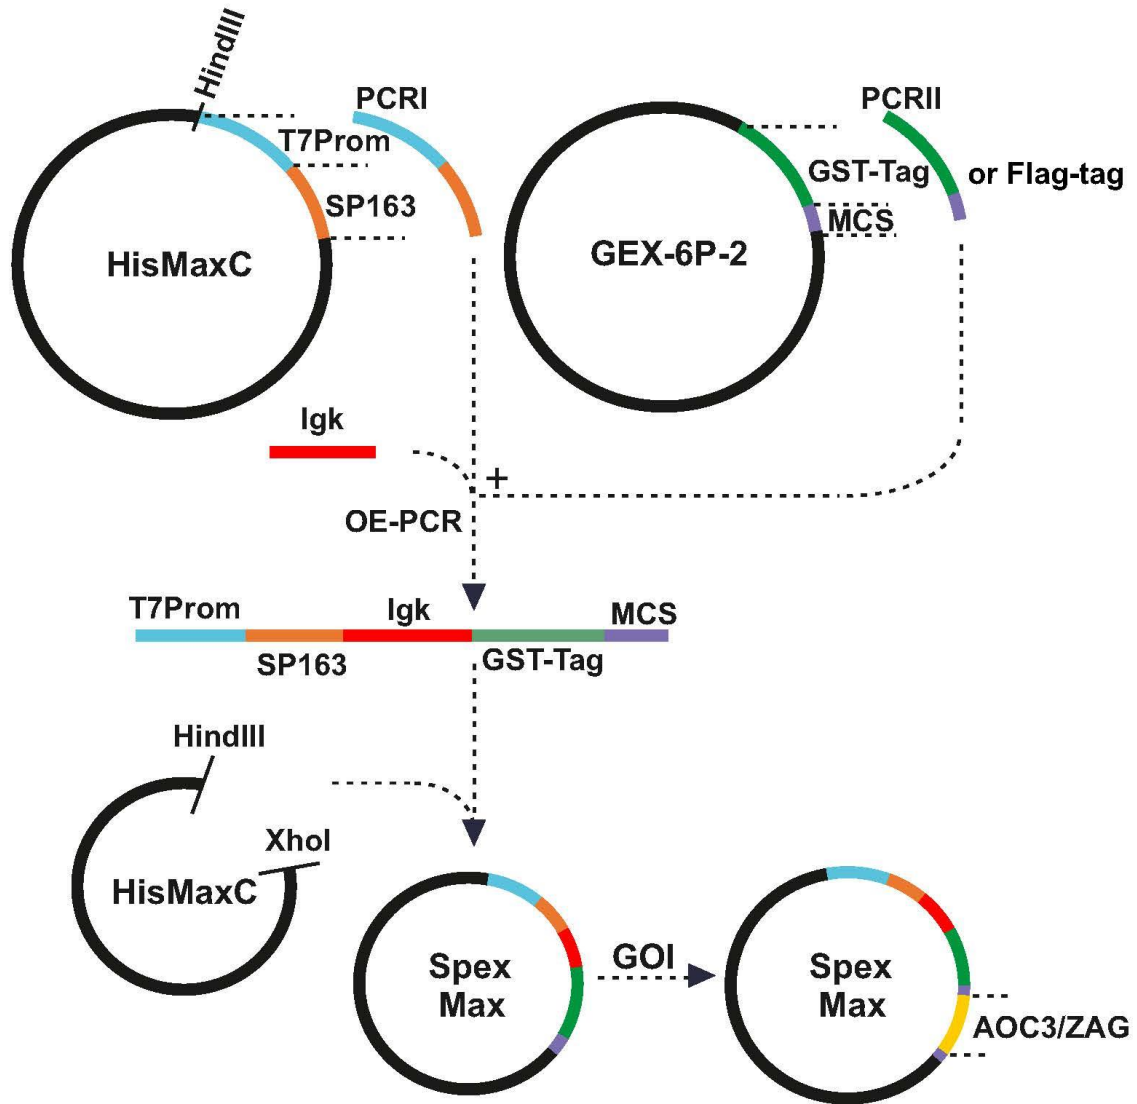

1532

1533

1534



1535 **Figure 10:**

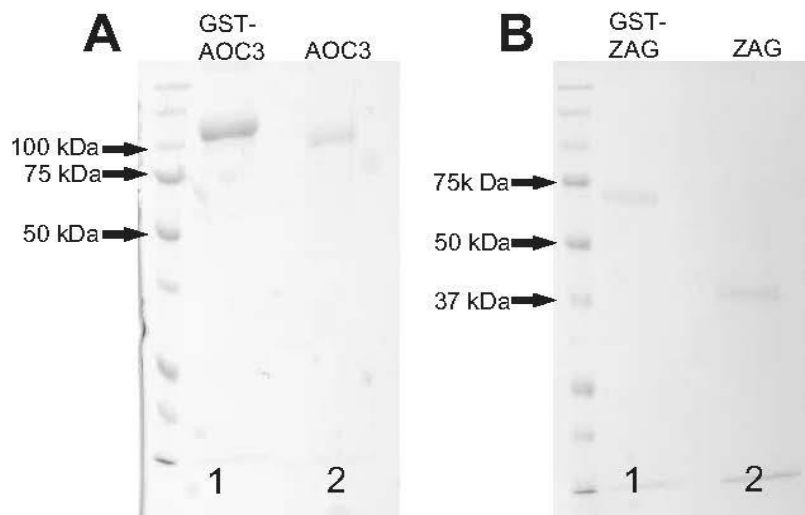

1536

1537

1538

1539

1540

1541

1542

1543

1544

1545

1546 **Figure 11:**

1547

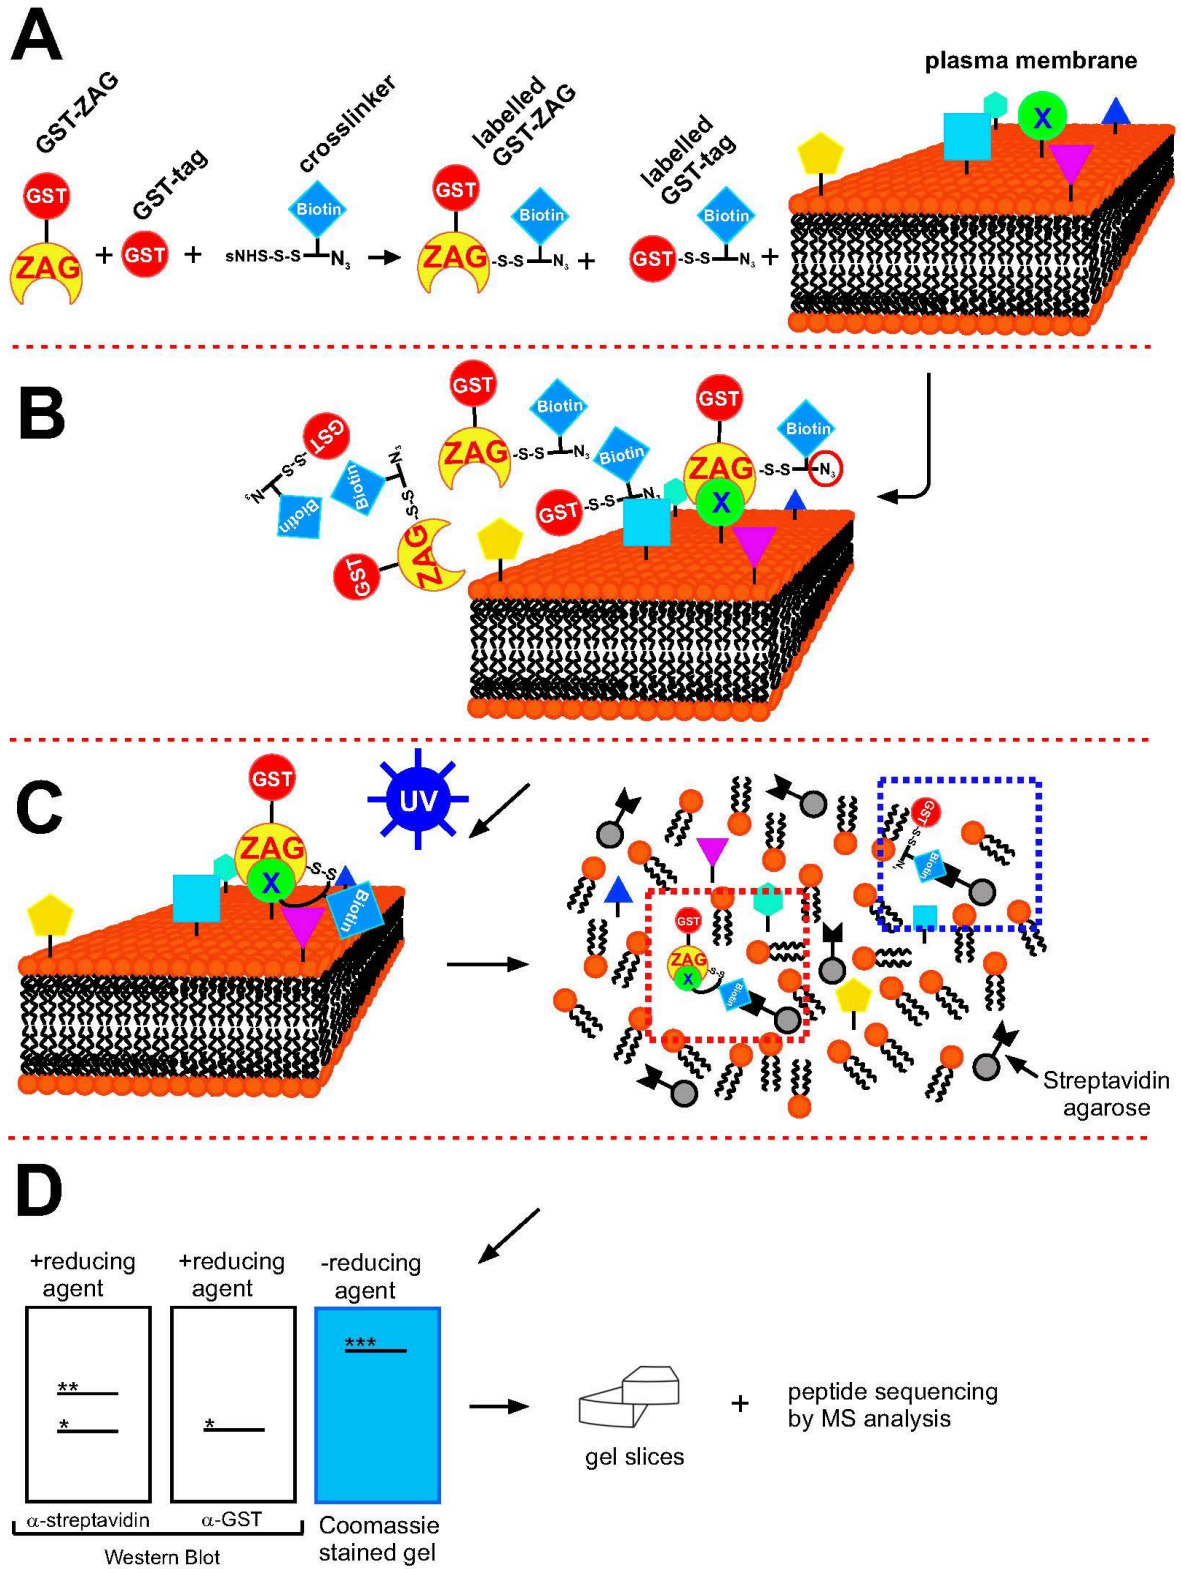

Source: http://biorxiv.org/content/10.1101/727214v1.full.pdf
